# Supplementary material for: Psychiatry as a career choice among medical students: a cross-sectional study examining school-related and non-school factors
Source: PubMed Central journal article supplement — BMJ Open. 2018 Aug 17;8(8):e022201. doi: 10.1136/bmjopen-2018-022201 (PMC6104786; doi:10.1136/bmjopen-2018-022201), 2018-08-17
Supplement: bmjopen-2018-022201.draft_revisions.pdf [file bmjopen-2018-022201.draft_revisions.pdf]

# BMJ Open

BMJ Open is committed to open peer review. As part of this commitment we make the peer review history of every article we publish publicly available.

When an article is published we post the peer reviewers' comments and the authors' responses online. We also post the versions of the paper that were used during peer review. These are the versions that the peer review comments apply to.

The versions of the paper that follow are the versions that were submitted during the peer review process. They are not the versions of record or the final published versions. They should not be cited or distributed as the published version of this manuscript.

BMJ Open is an open access journal and the full, final, typeset and author-corrected version of record of the manuscript is available on our site with no access controls, subscription charges or pay-per-view fees (<http://bmjopen.bmj.com>).

If you have any questions on BMJ Open's open peer review process please email [info.bmjopen@bmj.com](mailto:info.bmjopen@bmj.com)

# BMJ Open

## Psychiatry as a Career Choice among Medical Students: A Cross-Sectional Study Examining School-Related and Non-School Factors

|                               |                                                                                                                                                                                                                                                                                                                                                                                                                                                                                                                                                                                                                                                                                 |
|-------------------------------|---------------------------------------------------------------------------------------------------------------------------------------------------------------------------------------------------------------------------------------------------------------------------------------------------------------------------------------------------------------------------------------------------------------------------------------------------------------------------------------------------------------------------------------------------------------------------------------------------------------------------------------------------------------------------------|
| Journal:                      | <i>BMJ Open</i>                                                                                                                                                                                                                                                                                                                                                                                                                                                                                                                                                                                                                                                                 |
| Manuscript ID                 | bmjopen-2018-022201                                                                                                                                                                                                                                                                                                                                                                                                                                                                                                                                                                                                                                                             |
| Article Type:                 | Research                                                                                                                                                                                                                                                                                                                                                                                                                                                                                                                                                                                                                                                                        |
| Date Submitted by the Author: | 08-Feb-2018                                                                                                                                                                                                                                                                                                                                                                                                                                                                                                                                                                                                                                                                     |
| Complete List of Authors:     | Seow, Lee Seng Esmond; Institute of Mental Health, Research Division Chua, Boon Yiang; Institute of Mental Health, Research Division Mahendran, Rathi; Yong Loo Lin School of Medicine, National University of Singapore, Psychological Medicine; Duke-NUS Medical School, Clinical, Academic and Faculty Affairs<br>Verma, S; Duke-NUS Medical School, Clinical, Academic and Faculty Affairs<br>Ong, Hui Lin; Institute of Mental Health, Research Division<br>Samari, Ellaisha; Institute of Mental Health, Research Division<br>Chong, Siow Ann ; Institute of Mental Health, Research Division<br>Subramaniam, M; Institute of Mental Health, Singapore, Research Division |
| Keywords:                     | PSYCHIATRY, EDUCATION & TRAINING (see Medical Education & Training), MEDICAL EDUCATION & TRAINING                                                                                                                                                                                                                                                                                                                                                                                                                                                                                                                                                                               |
|                               |                                                                                                                                                                                                                                                                                                                                                                                                                                                                                                                                                                                                                                                                                 |

SCHOLARONE™  
Manuscripts

1  
2  
3 **Psychiatry as a Career Choice among Medical Students: A Cross-Sectional Study Examining**  
4 **School-Related and Non-School Factors**  
5

6 Lee Seng Esmond Seow<sup>1</sup>

7 [esmond\\_LS\\_SEOW@imh.com.sg](mailto:esmond_LS_SEOW@imh.com.sg)

8  
9 Boon Yiang Chua<sup>1</sup>

10 [boon\\_yiang\\_chua@imh.com.sg](mailto:boon_yiang_chua@imh.com.sg)

11  
12 Rathi Mahendran<sup>2,3</sup>

13 [pcmrathi@nus.edu.sg](mailto:pcmrathi@nus.edu.sg)

14  
15 Swapna Verma<sup>3</sup>

16 [swapna\\_verma@imh.com.sg](mailto:swapna_verma@imh.com.sg)

17  
18 Hui Lin Ong<sup>1</sup>

19 [Hui\\_Lin\\_ONG@imh.com.sg](mailto:Hui_Lin_ONG@imh.com.sg)

20  
21 Ellaisha Samari<sup>1</sup>

22 [Ellaisha\\_SAMARI@imh.com.sg](mailto:Ellaisha_SAMARI@imh.com.sg)

23  
24 Siow Ann Chong<sup>1</sup>

25 [siow\\_ann\\_chong@imh.com.sg](mailto:siow_ann_chong@imh.com.sg)

26  
27 Mythily Subramaniam<sup>1</sup>

28 [mythily@imh.com.sg](mailto:mythily@imh.com.sg)

29  
30 <sup>1</sup>Research Division, Institute of Mental Health, Singapore

31  
32 <sup>2</sup>Psychological Medicine, Yong Loo Lin School of Medicine, National University of Singapore

33  
34 <sup>3</sup>Clinical, Academic and Faculty Affairs, Duke-NUS Graduate Medical School

35  
36 **Corresponding Author**

37  
38 Seow Lee Seng, Esmond

39 Research Division

40 Institute of Mental Health, Singapore

41 Buangkok Green Medical Park

42 10 Buangkok View

43 Singapore 539747

44 Tel: 65-63892785

45 Email: [esmond\\_LS\\_SEOW@imh.com.sg](mailto:esmond_LS_SEOW@imh.com.sg)

## Abstract

**Objectives:** Given the low recruitment to psychiatry worldwide, the current study aimed to examine how pre- and intra- medical school factors, perception of career aspects, attitudes towards psychiatry, stigma towards mental illness, and personality traits may affect a choice in psychiatry as a career.

**Design:** Cross-sectional online study.

**Participants:** 502 medical students from two public medical institutions in Singapore.

**Methods:** We critically examined existing literature for factors identified to influence a psychiatric career choice and explored their joint effects among medical students in a cross-sectional study. To avoid overloading the regression model, this analysis only included variables shown to have significant association ( $p < 0.05$ ) with the outcome variable from the initial Chi-square tests and independent t-tests analyses.

**Results:** Both pre- and intra- medical school factors were found to affect students' choice of psychiatry as a career, including a considerable number of non-medical school factors such as pre-school influences, personality trait and importance of a high status specialty in medicine. Among medical school factors, only enrichment activities such as attending a psychiatry or mental health club or optional elective were influential factors associated with choosing a career in psychiatry. Negative attitudes towards psychiatry, but not stigma towards people with mental illness, significantly predicted the rejection of psychiatry as a career.

**Conclusions:** Improving education environment or teaching practice in psychiatric training may aid in future recruitment trend for psychiatrists. While the changing of pre-medical school influences or personality factors may be infeasible, medical schools and psychiatry institutes could play a more critical role by enhancing enrichment activities or clerkship experience to bring about a more positive attitudinal change towards psychiatry among students who did consider a career in psychiatry.

**Strength and limitation of this study**

- Although studies have examined factors associated with choosing psychiatry as a career, none have looked into such extensive range of factors in a single study.
- There have been limited studies that explored psychiatry career among a sample of Asian medical students.
- Cross-sectional study design limits the ability to draw causal conclusions.
- The lack of qualitative data may also limit our understanding of how students were being influenced by certain factors in determining their career choice.

## Introduction

An estimated 450 million people worldwide are believed to suffer from a mental or behavioral disorder, and one in four people will be affected by these conditions in some point of their life [1]. Despite the substantial disease disability and burden associated with mental disorders, there has been a shortage of psychiatrists in the field, sometimes termed as the “recruitment crisis” [2]. For instance, the number of medical graduates choosing to specialize in psychiatry within the United States has shown a distinct decline from a consistent annual rate of 7-10% during post-World War II period to approximately just 3-4% in 2002-2007 [3, 4]. Although recent data from the US indicates a reversal of trends, World Health Organization data indicates that up to 45% of the world population lived in a country that did not meet recommended ratios of one psychiatrist for every 100,000 people.

Many factors influence medical students’ career specialty decisions which may be decided before, during or after their training in medical school. The extant literature has emphasized on pre- and intra-medical school factors associated with choosing psychiatry as a specialty. The former include gender, ethnicity and exposure to mental illness while the latter include teaching methods, clinical exposure and enrichment activities related to the specialty [5-7]. Common reasons for rejection of psychiatry as a career include low respect for psychiatry among the various medical specialties, low salary and negative comments by friends and family about choosing psychiatry [8, 9]. The attitudes of medical students towards psychiatry have also been one of the most commonly researched topics in the psychiatry career literature. Most studies have reported an overall positive attitude towards psychiatry or a positive attitudinal change following psychiatric clerkship [10-12] but despite this, psychiatry as a career choice remains unpopular among students [13, 14]. Stigma towards mental illness has been increasingly identified as a potential factor that influences medical students’ attitudes towards psychiatry and deters them from choosing psychiatry as a career [15, 16]. The personality correlates of a career interest in psychiatry were also explored in a few studies [17-19].

The recruitment of medical students into the field of psychiatry is important to mental health educators and has also become an increasing priority of healthcare policy makers [20]. Given the multifactorial nature of a student’s specialty choice, understanding these

1  
2  
3 factors could aid in the recruitment and mentoring strategies to increase the uptake and  
4 quality of students choosing psychiatry [21]. The current study, therefore, seeks to identify  
5 factors associated with the choice of specialization in psychiatry among pre- and intra-  
6 medical school factors, perception of career aspects, attitudes towards psychiatry, stigma  
7 towards mental illness, and personality traits in a group of medical students from Singapore.  
8  
9

## 10 11 12 **Methods**

### 13 14 15 ***Study Participants***

16  
17 Students enrolled in the two most established medical schools (one undergraduate and one  
18 graduate medical school) in Singapore were invited to take part in a web-based survey  
19 administered in the English language via school email. A total of 502 students were  
20 recruited from August to September 2016. Quota limits were set to ensure adequate  
21 participation of students from each institution and across their academic years. Informed  
22 consent was administered prior to the survey. The study was approved by the ethics  
23 committee of the Domain Specific Review Board of the National Healthcare Group,  
24 Singapore.  
25  
26  
27  
28  
29  
30

### 31 32 ***Instrument***

33  
34 The current study adapted an online questionnaire used in a cross-sectional survey that  
35 aimed to investigate factors which influence psychiatric career choice among medical  
36 students across 20 other countries [6] and further modified it to include additional factors.  
37 The questionnaire collected sociodemographic data and the following information on:  
38  
39  
40  
41

### 42 43 ***Pre-Medical School Factors***

44  
45 These included pre-medical school influences in choosing medicine and psychiatry (e.g.,  
46 parents' wishes, wider family and friends' advices, close contact with a trusted doctor/nurse  
47 who is a family member or a close friend, portrayal of doctor/nurses in books, television and  
48 the media, personal and family experience of a physical illness or mental illness, prior work  
49 experience), pre-medical school career choice, highest academic qualifications and subjects  
50 exposed to prior to admission (refer to Appendix A for the full list of subjects).  
51  
52  
53  
54  
55

### 56 57 ***Intra-Medical School Factors***

1  
2  
3 These included intra-medical school influences in choosing medicine and psychiatry (e.g.,  
4 academics and lectures, school advisors or tutors, clinicians during placement, other  
5 students in the same course), psychiatry-related enrichment activities (e.g., optional  
6 electives, psychiatry/mental health club and program, research experience, volunteering  
7 with mentally-ill patients), weeks of psychiatric training attended, clinical exposure factors  
8 including reported highest responsibility for patient care during placement and subjects  
9 taught at medical schools (refer to Appendix B).  
10  
11  
12  
13  
14  
15

### 16 ***Importance of Career Aspects in Choice of Specialty***

17  
18 These included 12 individual factors namely academic opportunities, research opportunities,  
19 competition for training places, flexible working, job prospects, work-life balance,  
20 perception of competency, job satisfaction, likelihood of suffering emotional drain/burnout,  
21 pay, prestige among general public, high status among medicine, work-life balance,  
22 perception of competency, and job satisfaction. Participants were asked to rate whether  
23 each of these factors was important, not important, or indifferent in their choice of career.  
24  
25  
26  
27  
28  
29

### 30 ***Others***

31  
32 We also included two validated instruments- the Attitude to Psychiatry Scale (ATP-18) and  
33 the Opening Minds Stigma Scale for Healthcare Providers (OMS-HC) to measure stigma  
34 towards psychiatry and mental illness respectively. A principal component analysis of the  
35 ATP-18 revealed a 3-factor structure which reflected 1) an unsympathetic view of  
36 psychiatry- its practitioners, patients and treatments, 2) dissatisfaction with the subject  
37 matter of psychiatry and 3) approval and interest in psychiatric skills and methods [22] while  
38 the OMS-HC favored a 3- factor structure which included 1) attitudes towards people with  
39 mental illness, 2) disclosure/help-seeking and 3) social distance [23]. Finally, for the purpose  
40 of measuring the Big Five factors of personality (extraversion, agreeableness,  
41 conscientiousness, neuroticism and openness to experience) in our study, the Mini-  
42 International Personality Item Pool (mini-IPIP) [24] was used.  
43  
44  
45  
46  
47  
48  
49  
50  
51

### 52 ***Coding of Outcome Variable***

53  
54 Participants were first asked to rate their likelihood of a career in various specialties—  
55 pediatrics, radiography, general practice/ primary care, clinical laboratory sciences,  
56  
57  
58  
59  
60



1  
2  
3 anaesthetics, obstetrics and gynaecology, accident and emergency medicine, surgery,  
4 psychiatry and general internal medicine—before proceeding to the remaining  
5 questionnaire. This variable was measured on a 5-point Likert-type scale (no way, unlikely,  
6 possible, seriously considering and definitely). As proposed by Farooq et al. [6], the use of  
7 this outcome as a continuous variable was not recommended given that it was a subjective  
8 ordinal variable and the distribution was also not normal. A preliminary analysis revealed a  
9 less than 10% response rate for students who had endorsed strong likelihood (seriously  
10 considering and definitely) for specializing in psychiatry and would result in a low power for  
11 calculation. For the purpose of this study, we have therefore created a binary outcome, with  
12 students being “unlikely” to specialize in psychiatry (no way, unlikely) as the interest group  
13 versus students being “likely” to specialize in psychiatry (possible, seriously considering and  
14 definitely).

### 24 **Statistical Analyses**

25  
26 Statistical analyses were performed using IBM Statistical Package for the Social Science  
27 (SPSS) version 23.0. Statistical significance was set at  $p < 0.05$  level. Descriptive statistics were  
28 tabulated for the overall sample. Frequency and percentage were calculated for categorical  
29 variables, while mean and standard deviation were calculated for all other continuous  
30 variables. Chi-square tests and independent t-tests were performed to analyze the effect of  
31 separate categorical and continuous variables respectively. A final multiple logistic  
32 regression was then performed to examine the factors associated with ‘not choosing’  
33 psychiatry as a career. To avoid overloading the regression model, this analysis only  
34 included variables shown to have significant association with the outcome variable from the  
35 initial bivariate analyses. A backwards selection procedure was employed to allow  
36 elimination of non-significant variables one at a time, based on the probability of the Wald  
37 statistic, until only the statistically significant variables remained.

### 48 **Results**

#### 51 ***Likelihood of Rejecting Psychiatry as a Career***

52  
53 In the current study, the majority 281 (56.0%) students were “unlikely” (no way, unlikely) to  
54 specialize in psychiatry while the rest were considered either possible or likely to specialize  
55  
56  
57  
58  
59  
60

1  
2  
3 in psychiatry (i.e., the “likely” group). Within the latter group, only 4 students (0.8%) had  
4 rated “definitely decided to do” psychiatry.  
5

### 6 7 ***Sociodemographic***

8  
9 The sociodemographic characteristics and correlates are presented in Table 1. The  
10 respondents had a mean age of 22.4 years (SD=3.1, range=16 to 35) and were mainly  
11 females (58.8%), Chinese (93.0%), those who were in an undergraduate medical course  
12 (76.3%), had a monthly household income of below \$4,000 (37.1%) and were year 1  
13 students (26.3%). Both age and the year of schooling were found to be factors associated  
14 with the likelihood of rejecting psychiatry.  
15  
16  
17  
18

### 19 20 ***Pre-Medical School Factors***

21  
22 Table 2 presents the pre-medical school factors associated with the likelihood of not  
23 specializing in psychiatry. Sources of influence that showed significant associations include  
24 having close contact with a trusted doctor or nurse, personal or family experience of a  
25 physical illness and of a mental illness. The lack of interest in psychiatry and the highest  
26 education level attained, both prior to admission, were also significant in predicting the  
27 rejection of psychiatry. Our analysis did not reveal significant association with any of the  
28 subjects listed in Appendix A.  
29  
30  
31  
32  
33  
34  
35

### 36 37 ***Intra-Medical School Factors***

38  
39 Table 3 presents the intra-medical school factors associated with the likelihood of not  
40 specializing in psychiatry. Sources of influence that showed significant associations include  
41 academics and lectures, and junior clinicians during placement. Having attended an optional  
42 elective in psychiatry or joined a psychiatry/ mental health club was associated with  
43 choosing psychiatry as a career. Those who completed their clinical placement in psychiatry  
44 were less likely to specialise in psychiatry than those who did not. Weeks of psychiatry  
45 training received and level of responsibility in patient care were also significant factors for  
46 not choosing psychiatry. Our analysis did not reveal significant association with most  
47 subjects, except ‘Neuroscience,’ taken at medical school.  
48  
49  
50  
51  
52  
53

### 54 55 ***Career Prospects Associated with Psychiatry as a Career Choice***

1  
2  
3 Of the 12 individual career prospects, bivariate analyses revealed that only those who  
4 perceived 'high status among medicine' as an important career aspect were more likely to  
5 be deterred from choosing psychiatry as a career (Table 4).  
6  
7

### 8 ***Attitude towards Psychiatry and Stigma against Mental Illness***

9  
10 Table 5 reveals that those who were unlikely to choose psychiatry had significantly lower  
11 ATP-18 score (greater negative attitudes towards psychiatry) and higher OMS-HC (greater  
12 stigma towards people with mental illness) score than their counterparts.  
13  
14  
15

### 16 ***Personality***

17  
18 Among the self-rated personality traits, only agreeableness and neuroticism were found to  
19 be significant factors associated with psychiatry as a career on the mini-IPIP. Those who  
20 were unlikely to join psychiatry scored significantly lower in these two personality trait  
21 (Table 6).  
22  
23  
24  
25

### 26 ***Logistic Regression***

27  
28 The logistic regression was the final statistical analysis used to examine the joint effect of  
29 various factors upon likelihood of rejecting a career in psychiatry and nine factors remained  
30 significant (Table 7). Medical students who were unlikely to choose psychiatry as a career  
31 were significantly older (OR=1.18), had longer weeks of psychiatric training (OR=2.67 for  
32 those with  $\leq 5$  weeks and OR=2.60 for those with  $> 5$  weeks compared to those who did not  
33 receive any training), and were those who perceived a specialty which has 'high status in  
34 medicine' as important (OR=1.97), compared to those who were indifferent. Those who had  
35 close contact with a trusted doctor/nurse (OR=0.52), interest in psychiatry prior to  
36 admission (OR=0.05), postgraduate degree (OR=0.05; compared to pre-tertiary education)  
37 prior to admission, joined a psychiatry or mental health club (OR=0.24) were less likely to  
38 reject psychiatry as a career. Lastly, those who were unlikely to join psychiatry had  
39 significantly lower ATP-18 and neuroticism trait scores compared to their counterparts.  
40  
41  
42  
43  
44  
45  
46  
47  
48  
49  
50

### 51 ***Discussion***

52  
53 The current study attempts to examine multiple factors identified from the literature as  
54 affecting psychiatry as a career choice. These factors include pre-and intra- medical school  
55  
56  
57

1  
2  
3 influences, career aspects, attitude to psychiatry, stigma towards mental illness, and  
4 personality traits. While numerous studies have explored factors associated with choosing  
5 psychiatry as a career, none have looked into such extensive range of factors in a single  
6 study. A combination of student characteristics, values, needs, medical school experiences,  
7 and perception of specialties were found to influence the students' career decision in  
8 psychiatry in our sample.  
9  
10  
11  
12

### 13 ***Pre- and Intra- Medical School Factors***

14  
15  
16 Both pre- and intra- medical school factors were found to influence students' choice of  
17 psychiatry as a career. Our study did reveal a considerable number of non-medical school  
18 factors such as pre-school influences, personality trait and importance of a high status  
19 specialty in medicine to be significant in affecting psychiatry as a career. Preference of  
20 specialty prior to medical school was also a strong predictor (OR=10.8) in the study by  
21 Farooq et al. [6] where 78% of those who expressed interest in psychiatry when entering  
22 medical school remained likely to choose psychiatry during their final year. No association  
23 was, however, found for students' qualification before medical school in Farooq's study. Our  
24 finding on higher neuroticism among those who were more likely to pursue a career in  
25 psychiatry was also supported by other studies that cited neuroticism or the presence of  
26 emotional disturbance as the central motivating factor in pursuing psychiatric practice [25,  
27 26]. The underlying psychological conflict of these individuals who choose to become  
28 psychiatrists has been described as 'often severe but not necessarily of neurotic quality' and  
29 they may be searching for an answer to a strong inner drive that seeks to resolve the  
30 experienced conflict [27].  
31  
32  
33  
34  
35  
36  
37  
38  
39  
40  
41  
42

43 Manassis et al. [28] had identified the most influential career choice factors by psychiatry  
44 residents to be initial interest, clerkship experiences and enrichment activities. Similarly, we  
45 found enrichment activities such as joining a mental health/ psychiatry club (p=0.005) and  
46 attending optional courses/ modules/ electives (p=0.05) to be influential factors in our final  
47 logistic regression. Again, these were two of the six variables that remained significantly  
48 associated with students being likely to pursue psychiatry as a career in the regression  
49 model of Farooq's study. Studies have also emphasized developing and improving specific  
50  
51  
52  
53  
54  
55  
56  
57  
58  
59  
60

1  
2  
3 enrichment activities such as electives or university psychiatry societies to further enhance  
4 recruitment to psychiatry [29-31].  
5

6  
7 With respect to clerkship experience, our study may imply that those who were exposed to  
8 a clinical placement were more likely to reject specializing in psychiatry although the result  
9 was not significant in the multivariable analysis. A study among local medical students  
10 revealed positive attitudinal change but worsening associative stigma towards psychiatry  
11 following a clinical rotation and suggested that stigma relating to psychiatry could be the  
12 main cause for a lack of consideration of psychiatry as a career [11]. Another study among  
13 local nursing students also revealed that those who did attend a psychiatric placement had  
14 higher stigmatizing attitudes towards people with mental illness than those who did not  
15 (Samari et al., 2017).  
16  
17  
18  
19  
20  
21  
22

23 One possibility could be that the medical students undergoing clinical rotation in psychiatry  
24 in Singapore were generally exposed to sicker and more chronic patients which lead them to  
25 view psychiatry more negatively. Nonetheless, further qualitative research may be required  
26 to establish the underlying reasons.  
27  
28  
29  
30

### 31 ***Societal Stigma***

32  
33 Studies have generally found that medical students considering a career in psychiatry tend  
34 to be exposed to stigmatizing comments by others including family members and friends, or  
35 the general public on their career choice and therefore, alienating themselves from  
36 psychiatry as a career [9, 32]. However, our study did not find any significant influences due  
37 to parents' wishes, wider family and friends' advice, prestige among general public or even  
38 other students in the same course. Rather, our data has revealed factors such as the  
39 influence of junior clinicians (but not senior clinicians) during placements and having close  
40 contact with a trusted doctor/ nurse who could be a family member or close friend to be  
41 significant in influencing a career in psychiatry. This probably suggests that the medical  
42 students in our sample may be more potentially influenced by contact with healthcare  
43 professionals whom they have a stronger sense of connection with compared to those from  
44 their social networks.  
45  
46  
47  
48  
49  
50  
51  
52  
53

### 54 ***Attitudes towards Psychiatry and Stigma towards Mental Illness***

1  
2  
3 The ATP-18 explores academic and clinical domains as well as perceptions of psychiatrists  
4 and psychiatric patients [22] while the OMS-HC assesses stigma and behavioural  
5 discrimination towards people with mental illness among healthcare workers [23]. Our  
6 study showed that those who were likely to reject psychiatry as a career were those who  
7 had lower ATP-18 score and higher OMS-HC score at bivariate analyses. Multivariate  
8 analysis, however, revealed that only ATP-18 score were significant in predicting the  
9 likelihood of not choosing psychiatry as a career. This may suggest that medical students in  
10 our sample were more likely to reject psychiatry as a career mainly due to their  
11 dissatisfaction with psychiatric practice but not because they had a stigmatizing attitude  
12 towards patients with mental illness or mental illness itself. Our data on ATP-18 was  
13 consistent with past research [6, 33, 34] showing that those who were likely to specialize in  
14 psychiatry had a higher score or positive attitude towards psychiatry. While strategies on  
15 teaching practices such as the exposure to and taking responsibility for patients who are  
16 motivated and recovering, as well as co-taught seminars by both patients and professionals  
17 to improve medical students' attitudes towards psychiatry have been proposed [26, 35],  
18 studies also found that changes in education environment may not necessarily lead to  
19 significant increase in number of students wanting to pursue psychiatry [11, 36].  
20  
21  
22  
23  
24  
25  
26  
27  
28  
29  
30  
31

### 32 **Limitations**

33  
34  
35 The current study is cross-sectional, and is therefore unable to establish causal relationship  
36 between the various factors and likelihood of rejecting psychiatry as a career. For instance,  
37 it may be possible that those who were interested in or had decided on choosing psychiatry  
38 as a career had also joined the mental health or psychiatry club in their school due to their  
39 interest. The lack of qualitative data may have also limited our understanding of how these  
40 students were being influenced by their contact with junior clinicians and trusted  
41 doctor/nurse, along with the larger-scale cultural issues that might affect their decision to  
42 specialize in psychiatry.  
43  
44  
45  
46  
47  
48  
49

### 50 **Conclusion**

51  
52 Our study has revealed a low interest among medical students wanting to specialize in  
53 psychiatry. However, there is a pool of 8.6% of students who would seriously consider  
54 psychiatry as a career and this may be the group that could possibly be targeted at to  
55  
56  
57  
58  
59  
60

1  
2  
3 encourage recruitment into the field. While it may not be feasible to change aspects of pre-  
4 medical school influences, medical schools and psychiatry institutes could play a more  
5 critical role by improving clerkship experience or enhancing enrichment activities to bring  
6 about a more positive attitudinal change towards psychiatry in this group of students.  
7  
8  
9

### 10 **Contributors**

11  
12 LSES wrote the first draft of the article and conducted statistical analyses. BYC, HLO, ES and  
13 CBY made substantial contribution to the acquisition of data and provided intellectual input.  
14 RM, SV, SAC and MS had contributed to the conception and design and provided intellectual  
15 input. All authors have given final approval of the version to be published.  
16  
17  
18  
19

### 20 **Funding**

21  
22 This research is supported by the Singapore Ministry of Health's National Medical Research  
23 Council under the Centre Grant Programme (Grant No.: NMRC/CG/004/2013).  
24  
25  
26

### 27 **Competing interests**

28  
29 The authors declare that they have no competing interests.  
30  
31

### 32 **Ethics approval and consent to participate**

33  
34 The study was approved by the ethics committee of the Domain Specific Review Board of  
35 the National Healthcare Group, Singapore. All student participants have provided online  
36 consent to the study.  
37  
38  
39

### 40 **Provenance and peer review**

41  
42 Not commissioned; externally peer reviewed.  
43  
44  
45

### 46 **Data sharing statement**

47  
48 For access to data, please approach Associate Professor Mythily Subramaniam via  
49 mythily@imh.com.sg.  
50  
51  
52  
53  
54  
55  
56  
57  
58  
59  
60

**Table 1:** Socio-demographic profile (n=502)

|                          |                      | Total |      | Likely |      | Unlikely |      | p-value |
|--------------------------|----------------------|-------|------|--------|------|----------|------|---------|
|                          |                      | Mean  | S.D. | Mean   | S.D. | Mean     | S.D. |         |
| Age in years             |                      | 22.44 | 3.06 | 21.81  | 3.07 | 22.93    | 2.96 | <0.001  |
|                          |                      | N     | %    | N      | %    | N        | %    |         |
| Gender                   | Male                 | 207   | 41.2 | 85     | 41.1 | 122      | 58.9 | 0.263   |
|                          | Female               | 295   | 58.8 | 136    | 46.1 | 159      | 53.9 |         |
| Education                | Undergraduate        | 383   | 76.3 | 177    | 46.2 | 206      | 53.8 | 0.076   |
|                          | Postgraduate         | 119   | 23.7 | 44     | 37.0 | 75       | 63.0 |         |
| Monthly Household income | Below 4,000          | 186   | 37.1 | 91     | 48.9 | 95       | 51.1 | 0.193   |
|                          | 4,000-9,999          | 177   | 35.3 | 70     | 39.5 | 107      | 60.5 |         |
|                          | 10,000 & above       | 139   | 27.7 | 60     | 43.2 | 79       | 56.8 |         |
| Year of schooling        | 1 <sup>st</sup> year | 132   | 26.3 | 77     | 58.3 | 55       | 41.7 | <0.001  |
|                          | 2 <sup>nd</sup> year | 116   | 23.1 | 57     | 49.1 | 59       | 50.9 |         |
|                          | 3 <sup>rd</sup> year | 71    | 14.1 | 31     | 43.7 | 40       | 56.3 |         |
|                          | 4 <sup>th</sup> year | 87    | 17.3 | 32     | 36.8 | 55       | 63.2 |         |
|                          | 5 <sup>th</sup> year | 96    | 19.1 | 24     | 25.0 | 72       | 75.0 |         |

**Table 2:** Pre-medical school influences in choosing psychiatry

|                                                               |               | Likely |      | Unlikely |      | p-value             |       |
|---------------------------------------------------------------|---------------|--------|------|----------|------|---------------------|-------|
|                                                               |               | N      | %    | N        | %    |                     |       |
| Parents' wishes                                               | Yes           | 11     | 42.3 | 15       | 57.7 | 0.856               |       |
|                                                               | No            | 210    | 44.1 | 266      | 55.9 |                     |       |
| Wider family & friends' advices                               | Yes           | 29     | 51.8 | 27       | 48.2 | 0.214               |       |
|                                                               | No            | 192    | 43.0 | 254      | 57.0 |                     |       |
| A trusted doctor/ nurse who has close contact with you        | Yes           | 39     | 57.4 | 29       | 42.6 | 0.017               |       |
|                                                               | No            | 182    | 41.9 | 252      | 58.1 |                     |       |
| Portrayal of doctors/ nurses in books, television & the media | Yes           | 30     | 48.4 | 32       | 51.6 | 0.460               |       |
|                                                               | No            | 191    | 43.4 | 249      | 56.6 |                     |       |
| Personal/family experience of a physical illness              | Yes           | 40     | 56.3 | 31       | 43.7 | 0.024               |       |
|                                                               | No            | 181    | 42.0 | 250      | 58.0 |                     |       |
| Personal/family experience of a mental illness                | Yes           | 25     | 71.4 | 10       | 28.6 | 0.001               |       |
|                                                               | No            | 196    | 42.0 | 271      | 58.0 |                     |       |
| Prior work experience                                         | Yes           | 51     | 48.6 | 54       | 51.4 | 0.291               |       |
|                                                               | No            | 170    | 42.8 | 227      | 57.2 |                     |       |
| Interest in psychiatry prior to admission                     | Yes           | 19     | 95.0 | 1        | 5.0  | <0.001 <sup>a</sup> |       |
|                                                               | No            | 202    | 41.9 | 280      | 58.1 |                     |       |
| Highest education attained prior to admission                 | Pre-tertiary  |        | 177  | 46.2     | 206  | 53.8                | 0.033 |
|                                                               | Undergraduate |        | 35   | 33.7     | 69   | 66.3                |       |
|                                                               | Postgraduate  |        | 9    | 60.0     | 6    | 40.0                |       |

<sup>a</sup> p-value determined by Fisher's Exact Test



**Table 3:** Intra-medical school influences in choosing psychiatry

|                                                 |                                                    | Likely |      | Unlikely |      | p-value |
|-------------------------------------------------|----------------------------------------------------|--------|------|----------|------|---------|
|                                                 |                                                    | N      | %    | N        | %    |         |
| Academics or lectures                           | Yes                                                | 96     | 51.3 | 91       | 48.7 | 0.011   |
|                                                 | No                                                 | 125    | 39.7 | 190      | 60.3 |         |
| School advisors or tutors                       | Yes                                                | 81     | 42.9 | 108      | 57.1 | 0.682   |
|                                                 | No                                                 | 140    | 44.7 | 173      | 55.3 |         |
| Senior clinicians during placements             | Yes                                                | 91     | 40.6 | 133      | 59.4 | 0.168   |
|                                                 | No                                                 | 130    | 46.8 | 148      | 53.2 |         |
| Junior clinicians during placements             | Yes                                                | 55     | 36.4 | 96       | 63.6 | 0.024   |
|                                                 | No                                                 | 166    | 47.3 | 185      | 52.7 |         |
| Other students in the same course               | Yes                                                | 30     | 46.2 | 35       | 53.8 | 0.711   |
|                                                 | No                                                 | 191    | 43.7 | 246      | 56.3 |         |
| Attended optional courses/ modules/ electives   | Yes                                                | 32     | 58.2 | 23       | 41.8 | 0.025   |
|                                                 | No                                                 | 189    | 42.3 | 258      | 57.7 |         |
| Joined psychiatry/mental health club            | Yes                                                | 22     | 73.3 | 8        | 26.7 | 0.001   |
|                                                 | No                                                 | 199    | 42.2 | 273      | 57.8 |         |
| Joined student wellness/mental health programme | Yes                                                | 79     | 44.6 | 98       | 55.4 | 0.839   |
|                                                 | No                                                 | 142    | 43.7 | 183      | 56.3 |         |
| Research experience in psychiatry               | Yes                                                | 15     | 60.0 | 10       | 40.0 | 0.099   |
|                                                 | No                                                 | 206    | 43.2 | 271      | 56.8 |         |
| Volunteered with mentally-ill patients          | Yes                                                | 15     | 38.5 | 24       | 61.5 | 0.466   |
|                                                 | No                                                 | 206    | 44.5 | 257      | 55.5 |         |
| Weeks of psychiatric training                   | 0 week                                             | 153    | 55.2 | 125      | 44.8 | <0.001  |
|                                                 | ≤5 weeks                                           | 24     | 29.6 | 57       | 70.4 |         |
|                                                 | >5 weeks                                           | 43     | 30.3 | 99       | 69.7 |         |
| Completed clinical placement in psychiatry      | Yes                                                | 56     | 29.6 | 133      | 70.4 | <0.001  |
|                                                 | No                                                 | 165    | 52.7 | 148      | 47.3 |         |
| Level of responsibility in patient care         | No responsibility or asked opinion                 | 176    | 51.9 | 163      | 48.1 | <0.001  |
|                                                 | Clerking/assess risk/ do therapy under supervision | 45     | 27.6 | 118      | 72.4 |         |
| Took Neuroscience                               | Yes                                                | 154    | 41.0 | 222      | 59.0 | 0.017   |
|                                                 | No                                                 | 67     | 53.2 | 59       | 46.8 |         |

**Table 4:** Importance of career aspects in choice of speciality

| Factor                          | Category      | Likely |      | Unlikely |      | p-value |
|---------------------------------|---------------|--------|------|----------|------|---------|
|                                 |               | N      | %    | N        | %    |         |
| Academic opportunities          | Important     | 97     | 45.1 | 118      | 54.9 | 0.908   |
|                                 | Not important | 32     | 42.7 | 43       | 57.3 |         |
|                                 | Indifferent   | 92     | 43.4 | 120      | 56.6 |         |
| Research opportunities          | Important     | 66     | 46.2 | 77       | 53.8 | 0.827   |
|                                 | Not important | 54     | 43.5 | 70       | 56.5 |         |
|                                 | Indifferent   | 101    | 43.0 | 134      | 57.0 |         |
| Competition for training places | Important     | 128    | 44.4 | 160      | 55.6 | 0.975   |
|                                 | Not important | 19     | 43.2 | 25       | 56.8 |         |
|                                 | Indifferent   | 74     | 43.5 | 96       | 56.5 |         |
| Flexible working                | Important     | 155    | 44.0 | 197      | 56.0 | 0.723   |
|                                 | Not important | 10     | 37.0 | 17       | 63.0 |         |
|                                 | Indifferent   | 56     | 45.5 | 67       | 54.5 |         |
| Job prospects                   | Important     | 164    | 43.2 | 216      | 56.8 | 0.788   |
|                                 | Not important | 8      | 47.1 | 9        | 52.9 |         |
|                                 | Indifferent   | 49     | 46.7 | 56       | 53.3 |         |
| Emotional drain/ burnout        | Important     | 176    | 43.9 | 225      | 56.1 | 0.633   |
|                                 | Not important | 5      | 33.3 | 10       | 66.7 |         |
|                                 | Indifferent   | 40     | 46.5 | 46       | 53.5 |         |
| Salary/ Pay                     | Important     | 82     | 39.6 | 125      | 60.4 | 0.212   |
|                                 | Not important | 36     | 50.0 | 26       | 50.0 |         |
|                                 | Indifferent   | 103    | 46.2 | 120      | 53.8 |         |
| Prestige among general public   | Important     | 39     | 35.5 | 71       | 64.5 | 0.101   |
|                                 | Not important | 74     | 48.4 | 79       | 51.6 |         |
|                                 | Indifferent   | 108    | 45.2 | 131      | 54.8 |         |
| High status among medicine      | Important     | 31     | 32.6 | 64       | 67.4 | 0.041   |
|                                 | Not important | 79     | 45.4 | 95       | 54.6 |         |
|                                 | Indifferent   | 111    | 47.6 | 122      | 52.4 |         |
| Work-life balance               | Important     | 176    | 43.3 | 230      | 56.7 | 0.792   |
|                                 | Not important | 8      | 50.0 | 8        | 50.0 |         |
|                                 | Indifferent   | 37     | 46.3 | 43       | 53.8 |         |
| Perception of competency        | Important     | 92     | 42.4 | 125      | 57.6 | 0.811   |
|                                 | Not important | 32     | 45.7 | 38       | 54.3 |         |
|                                 | Indifferent   | 97     | 45.1 | 118      | 54.9 |         |
| Job satisfaction                | Important     | 186    | 42.2 | 253      | 57.6 | 0.053   |
|                                 | Not important | 4      | 36.4 | 7        | 63.6 |         |
|                                 | Indifferent   | 31     | 59.6 | 21       | 40.4 |         |

**Table 5:** Attitudes towards psychiatry and stigma towards people with mental illness

|        | Likely       | Unlikely     | p-value |
|--------|--------------|--------------|---------|
|        | Mean (S.D.)  | Mean (S.D.)  |         |
| ATP-18 | 66.66 (5.49) | 63.50 (6.08) | <0.001  |
| OMS-HC | 36.87 (6.59) | 39.10 (6.69) | <0.001  |

**Table 6:** Personality traits and their relation to the unlikelihood of choosing psychiatry

|                        | Likely |      | Unlikely |      | p-value |
|------------------------|--------|------|----------|------|---------|
|                        | Mean   | S.D. | Mean     | S.D. |         |
| Extraversion           | 11.19  | 3.65 | 11.47    | 3.58 | 0.397   |
| Agreeableness          | 16.35  | 2.26 | 15.63    | 2.38 | 0.001   |
| Conscientiousness      | 13.50  | 3.28 | 14.08    | 3.24 | 0.050   |
| Neuroticism            | 11.64  | 3.43 | 10.75    | 3.16 | 0.003   |
| Intellect/ Imagination | 14.57  | 3.02 | 14.69    | 3.09 | 0.662   |

**Table 7:** Logistic regression factors in rejecting psychiatry as a career\*

| Factor                                                 | Category     | Odds Ratio | 95% C.I. | 95% C.I. | P-value |
|--------------------------------------------------------|--------------|------------|----------|----------|---------|
|                                                        |              |            | Lower    | Lower    |         |
| Age (in years)                                         |              | 1.18       | 1.02     | 1.36     | 0.029   |
| A trusted doctor/ nurse who has close contact with you | Yes          | 0.52       | 0.28     | 0.94     | 0.030   |
|                                                        | No           | Ref.       |          |          |         |
| Interest in psychiatry prior to admission              | Yes          | 0.05       | 0.01     | 0.38     | 0.004   |
|                                                        | No           | Ref.       |          |          |         |
| Highest education attained prior to admission          | Postgraduate | 0.05       | 0.01     | 0.34     | 0.002   |
|                                                        | Pre-tertiary | Ref.       |          |          |         |
| Joined psychiatry/mental health club                   | Yes          | 0.24       | 0.09     | 0.64     | 0.005   |
|                                                        | No           | Ref.       |          |          |         |
| Weeks of psychiatric training                          | 0 week       | Ref.       |          |          |         |
|                                                        | ≤5 weeks     | 2.67       | 1.21     | 5.91     | 0.015   |
|                                                        | >5 weeks     | 2.60       | 1.44     | 4.70     | 0.002   |
| High status among medicine                             | Important    | 1.97       | 1.10     | 3.51     | 0.022   |
|                                                        | Indifferent  | Ref.       |          |          |         |
| ATP-18 score                                           |              | 0.92       | 0.88     | 0.96     | <0.001  |
| Neuroticism                                            |              | 0.92       | 0.86     | 0.98     | 0.009   |

\*Backwards selection procedure, variables entered initially (Step 1): age, stage of schooling, having close contact with a trusted doctor/nurse, personal/ family experience of a physical and mental illness, interest in psychiatry and highest education attained prior to admission, academic and lectures, junior clinicians during placement, optional courses and electives, mental health club membership, weeks of psychiatric training received, clinical placement, level of responsibility in psychiatric patient care, neuroscience module, high status among medicine, ATP-18 score, OMS-HC score, agreeableness and neuroticism.

## References

1. Sayers, J., *The world health report 2001 — Mental health: new understanding, new hope*. Bull World Health Organ, 2001. **79**(11): p. 1085.
2. Katschnig, H., *Are psychiatrists an endangered species? Observations on internal*. World Psychiatry, 2010. **9**(1): p. 21-8.
3. Tamaskar, P. and R.A. McGinnis, *Declining student interest in psychiatry*. JAMA, 2002. **287**(14): p. 1859.
4. Salsberg, E., et al., *US residency training before and after the 1997 Balanced Budget Act*. JAMA, 2008. **300**(10): p. 1174-80.
5. Halder, N., et al., *Student career choice in psychiatry: findings from 18 UK medical schools*. Int Rev Psychiatry, 2013. **25**(4): p. 438-44.
6. Farooq, K., et al., *Why medical students choose psychiatry - a 20 country cross-sectional survey*. BMC Med Educ, 2014. **14**: p. 12.
7. Farooq, K., G.J. Lydall, and D. Bhugra, *What attracts medical students towards psychiatry? A review of factors before and during medical school*. Int Rev Psychiatry, 2013. **25**(4): p. 371-7.
8. Balon, R., et al., *Medical Students' Attitudes and Views of Psychiatry*. Academic Psychiatry, 1999. **23**(1): p. 30-36.
9. Wiesenfeld, L., et al., *Choosing Psychiatry as a Career: Motivators and Deterrents at a Critical Decision-Making Juncture*. Can J Psychiatry, 2014. **59**(8): p. 450-4.
10. Ndeti, D.M., et al., *Attitudes toward psychiatry: a survey of medical students at the University of Nairobi, Kenya*. Acad Psychiatry, 2008. **32**(2): p. 154-9.
11. Mahendran, R., et al., *The impact of the educational environment on career choice and attitudes toward psychiatry*. Med Teach, 2015. **37**(5): p. 494-7.
12. Kuhnigk, O., et al., *Attitudes of Medical Students Towards Psychiatry*. Advances in Health Sciences Education, 2007. **12**(1): p. 87-101.
13. Lyons, Z., *Impact of the psychiatry clerkship on medical student attitudes towards psychiatry and to psychiatry as a career*. Acad Psychiatry, 2014. **38**(1): p. 35-42.
14. Lyons, Z., *Attitudes of medical students toward psychiatry and psychiatry as a career: a systematic review*. Acad Psychiatry, 2013. **37**(3): p. 150-7.
15. Dixon, R.P., et al., *Medical students' attitudes to psychiatric illness in primary care*. Med Educ, 2008. **42**(11): p. 1080-7.
16. Lyons, Z., et al., *Stigma towards mental illness among medical students in Australia and Ghana*. Acad Psychiatry, 2015. **39**(3): p. 305-8.
17. Walton, H.J., *Personality correlates of a career interest in psychiatry*. Br J Psychiatry, 1969. **115**(519): p. 211-9.
18. Mowbray, R.M., B.M. Davies, and N. Biddle, *Psychiatry as a career choice*. Aust N Z J Psychiatry, 1990. **24**(1): p. 57-64.
19. Monleon Moscardo, P.J., et al., *[Personality factors and psychiatry specialty attraction]*. Actas Esp Psiquiatr, 2001. **29**(1): p. 14-8.
20. Hoge, M.A., et al., *Mental health and addiction workforce development: federal leadership is needed to address the growing crisis*. Health Aff (Millwood), 2013. **32**(11): p. 2005-12.
21. Sierles, F.S., J. Yager, and S.H. Weissman, *Recruitment of U.S. medical graduates into psychiatry: reasons for optimism, sources of concern*. Acad Psychiatry, 2003. **27**(4): p. 252-9.
22. Wilkinson, D.G., B.K. Toone, and S. Greer, *Medical students' attitudes to psychiatry at the end of the clinical curriculum*. Psychol Med, 1983. **13**(3): p. 655-8.
23. Modgill, G., et al., *Opening Minds Stigma Scale for Health Care Providers (OMS-HC): examination of psychometric properties and responsiveness*. BMC Psychiatry, 2014. **14**: p. 120.
24. Donnellan, M.B., et al., *The mini-IPIP scales: tiny-yet-effective measures of the Big Five factors of personality*. Psychol Assess, 2006. **18**(2): p. 192-203.

- 1
  - 2
  - 3
  - 4
  - 5
  - 6
  - 7
  - 8
  - 9
  - 10
  - 11
  - 12
  - 13
  - 14
  - 15
  - 16
  - 17
  - 18
  - 19
  - 20
  - 21
  - 22
  - 23
  - 24
  - 25
  - 26
  - 27
  - 28
  - 29
  - 30
  - 31
  - 32
  - 33
  - 34
  - 35
  - 36
  - 37
  - 38
  - 39
  - 40
  - 41
  - 42
  - 43
  - 44
  - 45
  - 46
  - 47
  - 48
  - 49
  - 50
  - 51
  - 52
  - 53
  - 54
  - 55
  - 56
  - 57
  - 58
  - 59
  - 60
25. Maron, B.A., et al., *Ability of prospective assessment of personality profiles to predict the practice specialty of medical students*. Proc (Bayl Univ Med Cent), 2007. **20**(1): p. 22-6.
26. Eagle, P.F. and L.R. Marcos, *Factors in medical students' choice of psychiatry*. Am J Psychiatry, 1980. **137**(4): p. 423-7.
27. Ford, E.S., *Being and becoming a psychotherapist: the search for identity*. Am J Psychother, 1963. **17**: p. 472-82.
28. Manassis, K., et al., *Choosing a career in psychiatry: influential factors within a medical school program*. (1042-9670 (Print)).
29. Mihalynuk, T., et al., *Free choice and career choice: Clerkship electives in medical education*. Med Educ, 2006. **40**(11): p. 1065-71.
30. Weintraub, W., S.M. Plaut, and E. Weintraub, *Recruitment into psychiatry: increasing the pool of applicants*. Can J Psychiatry, 1999. **44**(5): p. 473-7.
31. Lyons, Z., *Establishment and implementation of a psychiatry enrichment programme for medical students*. Australasian Psychiatry, 2016: p. 1039856216671663.
32. Roberts Lw Fau - Bandstra, B.S. and B.S. Bandstra, *Addressing stigma to strengthen psychiatric education*. (1545-7230 (Electronic)).
33. Maidment, R., et al., *Carry on shrinking: career intentions and attitudes to psychiatry of prospective medical students*. Psychiatric Bulletin, 2003. **27**(1): p. 30-32.
34. Ndeti, D.M., et al., *Attitudes toward psychiatry: a survey of medical students at the University of Nairobi, Kenya*. (1042-9670 (Print)).
35. Coodin, S. and F. Chisholm, *Teaching in a new key: effects of a co-taught seminar on medical students' attitudes toward schizophrenia*. Psychiatr Rehabil J, 2001. **24**(3): p. 299-302.
36. Tharyan, P., et al., *Attitudes of 'tomorrow's doctors' towards psychiatry and mental illness*. Natl Med J India, 2001. **14**(6): p. 355-9.

**Appendix A**

Which subjects have you been exposed to before entering your current school?

|                             |                   |                        |
|-----------------------------|-------------------|------------------------|
| Economics                   | Psychology        | Philosophy             |
| Sociology                   | Modern Languages  | History                |
| Accounting/Finance/Business | Art/Design        | Classical Languages    |
| Chemistry                   | Geography         | Information Technology |
| Technology                  | Physics           | Music                  |
| Performing Arts             | General Studies   | Mathematics            |
| Politics                    | Religious Studies | Biology                |
| English                     | Sports Science    |                        |

**Appendix B**

Which of the following subjects/ courses have you been taught at your medical school?

|                     |                                                     |            |
|---------------------|-----------------------------------------------------|------------|
| Behavioral Sciences | Philosophy                                          | Psychology |
| Ethics              | Communication Skills                                | Sociology  |
| Neuroscience        | Other psychiatry and mental health related subjects |            |

**STROBE 2007 (v4) Statement—Checklist of items that should be included in reports of *cross-sectional studies***

| Section/Topic                | Item # | Recommendation                                                                                                                                                                       | Reported on page # |
|------------------------------|--------|--------------------------------------------------------------------------------------------------------------------------------------------------------------------------------------|--------------------|
| <b>Title and abstract</b>    | 1      | (a) Indicate the study’s design with a commonly used term in the title or the abstract                                                                                               | 1                  |
|                              |        | (b) Provide in the abstract an informative and balanced summary of what was done and what was found                                                                                  | 2                  |
| <b>Introduction</b>          |        |                                                                                                                                                                                      |                    |
| Background/rationale         | 2      | Explain the scientific background and rationale for the investigation being reported                                                                                                 | 4                  |
| Objectives                   | 3      | State specific objectives, including any prespecified hypotheses                                                                                                                     | 5                  |
| <b>Methods</b>               |        |                                                                                                                                                                                      |                    |
| Study design                 | 4      | Present key elements of study design early in the paper                                                                                                                              | 5                  |
| Setting                      | 5      | Describe the setting, locations, and relevant dates, including periods of recruitment, exposure, follow-up, and data collection                                                      | 5                  |
| Participants                 | 6      | (a) Give the eligibility criteria, and the sources and methods of selection of participants                                                                                          | 5                  |
| Variables                    | 7      | Clearly define all outcomes, exposures, predictors, potential confounders, and effect modifiers. Give diagnostic criteria, if applicable                                             | 5-7                |
| Data sources/<br>measurement | 8*     | For each variable of interest, give sources of data and details of methods of assessment (measurement). Describe comparability of assessment methods if there is more than one group | 5-7                |
| Bias                         | 9      | Describe any efforts to address potential sources of bias                                                                                                                            | 5                  |
| Study size                   | 10     | Explain how the study size was arrived at                                                                                                                                            | NA                 |
| Quantitative variables       | 11     | Explain how quantitative variables were handled in the analyses. If applicable, describe which groupings were chosen and why                                                         | 6-7                |
| Statistical methods          | 12     | (a) Describe all statistical methods, including those used to control for confounding                                                                                                | 7                  |
|                              |        | (b) Describe any methods used to examine subgroups and interactions                                                                                                                  | 7                  |
|                              |        | (c) Explain how missing data were addressed                                                                                                                                          | NA                 |
|                              |        | (d) If applicable, describe analytical methods taking account of sampling strategy                                                                                                   | NA                 |
|                              |        | (e) Describe any sensitivity analyses                                                                                                                                                | NA                 |
| <b>Results</b>               |        |                                                                                                                                                                                      |                    |

|                          |     |                                                                                                                                                                                                              |       |
|--------------------------|-----|--------------------------------------------------------------------------------------------------------------------------------------------------------------------------------------------------------------|-------|
| Participants             | 13* | (a) Report numbers of individuals at each stage of study—eg numbers potentially eligible, examined for eligibility, confirmed eligible, included in the study, completing follow-up, and analysed            | 5     |
|                          |     | (b) Give reasons for non-participation at each stage                                                                                                                                                         | NA    |
|                          |     | (c) Consider use of a flow diagram                                                                                                                                                                           | NA    |
| Descriptive data         | 14* | (a) Give characteristics of study participants (eg demographic, clinical, social) and information on exposures and potential confounders                                                                     | 8     |
|                          |     | (b) Indicate number of participants with missing data for each variable of interest                                                                                                                          | NA    |
| Outcome data             | 15* | Report numbers of outcome events or summary measures                                                                                                                                                         | 7     |
| Main results             | 16  | (a) Give unadjusted estimates and, if applicable, confounder-adjusted estimates and their precision (eg, 95% confidence interval). Make clear which confounders were adjusted for and why they were included | 7     |
|                          |     | (b) Report category boundaries when continuous variables were categorized                                                                                                                                    | 6-7   |
|                          |     | (c) If relevant, consider translating estimates of relative risk into absolute risk for a meaningful time period                                                                                             | NA    |
| Other analyses           | 17  | Report other analyses done—eg analyses of subgroups and interactions, and sensitivity analyses                                                                                                               | 7-9   |
| <b>Discussion</b>        |     |                                                                                                                                                                                                              |       |
| Key results              | 18  | Summarise key results with reference to study objectives                                                                                                                                                     | 9-10  |
| Limitations              | 19  | Discuss limitations of the study, taking into account sources of potential bias or imprecision. Discuss both direction and magnitude of any potential bias                                                   | 12    |
| Interpretation           | 20  | Give a cautious overall interpretation of results considering objectives, limitations, multiplicity of analyses, results from similar studies, and other relevant evidence                                   | 12-13 |
| Generalisability         | 21  | Discuss the generalisability (external validity) of the study results                                                                                                                                        | NA    |
| <b>Other information</b> |     |                                                                                                                                                                                                              |       |
| Funding                  | 22  | Give the source of funding and the role of the funders for the present study and, if applicable, for the original study on which the present article is based                                                | 13    |

\*Give information separately for cases and controls in case-control studies and, if applicable, for exposed and unexposed groups in cohort and cross-sectional studies.

**Note:** An Explanation and Elaboration article discusses each checklist item and gives methodological background and published examples of transparent reporting. The STROBE checklist is best used in conjunction with this article (freely available on the Web sites of PLoS Medicine at <http://www.plosmedicine.org/>, Annals of Internal Medicine at <http://www.annals.org/>, and Epidemiology at <http://www.epidem.com/>). Information on the STROBE Initiative is available at [www.strobe-statement.org](http://www.strobe-statement.org).



# BMJ Open

## Psychiatry as a Career Choice among Medical Students: A Cross-Sectional Study Examining School-Related and Non-School Factors

|                                 |                                                                                                                                                                                                                                                                                                                                                                                                                                                                                                                                                                                                                                                                                 |
|---------------------------------|---------------------------------------------------------------------------------------------------------------------------------------------------------------------------------------------------------------------------------------------------------------------------------------------------------------------------------------------------------------------------------------------------------------------------------------------------------------------------------------------------------------------------------------------------------------------------------------------------------------------------------------------------------------------------------|
| Journal:                        | <i>BMJ Open</i>                                                                                                                                                                                                                                                                                                                                                                                                                                                                                                                                                                                                                                                                 |
| Manuscript ID                   | bmjopen-2018-022201.R1                                                                                                                                                                                                                                                                                                                                                                                                                                                                                                                                                                                                                                                          |
| Article Type:                   | Research                                                                                                                                                                                                                                                                                                                                                                                                                                                                                                                                                                                                                                                                        |
| Date Submitted by the Author:   | 10-May-2018                                                                                                                                                                                                                                                                                                                                                                                                                                                                                                                                                                                                                                                                     |
| Complete List of Authors:       | Seow, Lee Seng Esmond; Institute of Mental Health, Research Division Chua, Boon Yiang; Institute of Mental Health, Research Division Mahendran, Rathi; Yong Loo Lin School of Medicine, National University of Singapore, Psychological Medicine; Duke-NUS Medical School, Clinical, Academic and Faculty Affairs<br>Verma, S; Duke-NUS Medical School, Clinical, Academic and Faculty Affairs<br>Ong, Hui Lin; Institute of Mental Health, Research Division<br>Samari, Ellaisha; Institute of Mental Health, Research Division<br>Chong, Siow Ann ; Institute of Mental Health, Research Division<br>Subramaniam, M; Institute of Mental Health, Singapore, Research Division |
| <b>Primary Subject Heading</b>: | Medical education and training                                                                                                                                                                                                                                                                                                                                                                                                                                                                                                                                                                                                                                                  |
| Secondary Subject Heading:      | Mental health                                                                                                                                                                                                                                                                                                                                                                                                                                                                                                                                                                                                                                                                   |
| Keywords:                       | PSYCHIATRY, EDUCATION & TRAINING (see Medical Education & Training), MEDICAL EDUCATION & TRAINING                                                                                                                                                                                                                                                                                                                                                                                                                                                                                                                                                                               |
|                                 |                                                                                                                                                                                                                                                                                                                                                                                                                                                                                                                                                                                                                                                                                 |

SCHOLARONE™  
Manuscripts

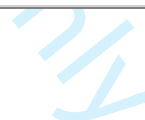

1  
2  
3 **Psychiatry as a Career Choice among Medical Students: A Cross-Sectional Study Examining**  
4 **School-Related and Non-School Factors**  
5

6 Lee Seng Esmond Seow<sup>1</sup>

7 [esmond\\_LS\\_SEOW@imh.com.sg](mailto:esmond_LS_SEOW@imh.com.sg)

8  
9 Boon Yiang Chua<sup>1</sup>

10 [boon\\_yiang\\_chua@imh.com.sg](mailto:boon_yiang_chua@imh.com.sg)

11  
12 Rathi Mahendran<sup>2,3</sup>

13 [pcmrathi@nus.edu.sg](mailto:pcmrathi@nus.edu.sg)

14  
15 Swapna Verma<sup>3</sup>

16 [swapna\\_verma@imh.com.sg](mailto:swapna_verma@imh.com.sg)

17  
18 Hui Lin Ong<sup>1</sup>

19 [Hui\\_Lin\\_ONG@imh.com.sg](mailto:Hui_Lin_ONG@imh.com.sg)

20  
21 Ellaisha Samari<sup>1</sup>

22 [Ellaisha\\_SAMARI@imh.com.sg](mailto:Ellaisha_SAMARI@imh.com.sg)

23  
24 Siow Ann Chong<sup>1</sup>

25 [siow\\_ann\\_chong@imh.com.sg](mailto:siow_ann_chong@imh.com.sg)

26  
27 Mythily Subramaniam<sup>1</sup>

28 [mythily@imh.com.sg](mailto:mythily@imh.com.sg)

29  
30 <sup>1</sup>Research Division, Institute of Mental Health, Singapore

31  
32 <sup>2</sup>Psychological Medicine, Yong Loo Lin School of Medicine, National University of Singapore

33  
34 <sup>3</sup>Clinical, Academic and Faculty Affairs, Duke-NUS Graduate Medical School

35  
36 **Corresponding Author**

37  
38 Seow Lee Seng, Esmond

39 Research Division

40 Institute of Mental Health, Singapore

41 Buangkok Green Medical Park

42 10 Buangkok View

43 Singapore 539747

44 Tel: 65-63892785

45 Email: [esmond\\_LS\\_SEOW@imh.com.sg](mailto:esmond_LS_SEOW@imh.com.sg)

## Abstract

**Objectives:** Given the low recruitment to psychiatry worldwide, the current study aimed to examine how pre- and intra- medical school factors, perception of career aspects, attitudes towards psychiatry, stigma towards mental illness, and personality traits may affect the likelihood of a choice in psychiatry as a career.

**Design:** Cross-sectional online study.

**Participants:** 502 medical students from two public medical institutions in Singapore.

**Methods:** We critically examined existing literature for factors identified to influence psychiatry as a career choice and explored their effects in a group of medical students in Singapore. To avoid overloading the regression model, this analysis only included variables shown to have significant association ( $p < 0.05$ ) with the outcome variable from the initial Chi-square tests and independent t-tests analyses.

**Results:** A considerable number of non-medical school factors such as pre-school influence and interests, personality trait and importance of a high status specialty in medicine were found to affect students' choice of psychiatry as a career. Among medical school factors, attending a psychiatry/ mental health club was the only influential factor. Negative attitudes towards psychiatry, but not stigma towards people with mental illness, significantly predicted the likelihood of not choosing psychiatry as a career.

**Conclusions:** Improving education environment or teaching practice in psychiatric training may aid in future recruitment trend for psychiatrists. While the changing of pre-medical school influences or personality factors may be infeasible, medical schools and psychiatry institutes could play a more critical role by enhancing enrichment activities or clerkship experience to bring about a more positive attitudinal change towards psychiatry among students who did consider a career in psychiatry.

## Strength and limitation of this study

- Although studies have examined factors associated with choosing psychiatry as a career, none have looked into such extensive range of factors in a single study.

- There have been limited studies that explored psychiatry career among a sample of Asian medical students.
- Cross-sectional study design limits the ability to draw causal conclusions.
- The lack of qualitative data may also limit our understanding of how students were being influenced by certain factors in determining their career choice.

For peer review only

## Introduction

1  
2  
3 An estimated 450 million people worldwide are believed to suffer from a mental or  
4 behavioral disorder, and one in four people will be affected by these conditions in some  
5 point of their life [1]. Despite the substantial disease disability and burden associated with  
6 mental disorders, there has been a shortage of psychiatrists in the field, sometimes termed  
7 as the “recruitment crisis” [2]. For instance, the number of medical graduates choosing to  
8 specialize in psychiatry within the United States has shown a distinct decline from a  
9 consistent annual rate of 7-10% during post-World War II period to approximately just 3-4%  
10 in 2002-2007 [3, 4]. Although recent data from the US indicates a reversal of trends, World  
11 Health Organization data indicates that up to 45% of the world population lived in a country  
12 that did not meet recommended ratio of one psychiatrist for every 100,000 people.  
13  
14  
15  
16  
17  
18  
19

20  
21 Many factors influence medical students’ career specialty decisions which may be decided  
22 before, during or after their training in medical school. The extant literature has emphasized  
23 on pre- and intra-medical school factors associated with choosing psychiatry as a specialty.  
24 The former include gender, ethnicity and exposure to mental illness while the latter include  
25 teaching methods, clinical exposure and enrichment activities related to the specialty [5-7].  
26 Common reasons for rejection of psychiatry as a career include low respect for psychiatry  
27 among the various medical specialties, low salary and negative comments by friends and  
28 family about choosing psychiatry [8, 9]. The attitudes of medical students towards  
29 psychiatry have also been one of the most commonly researched topics in the psychiatry  
30 career literature. Most studies have reported an overall positive attitude towards psychiatry  
31 or a positive attitudinal change following psychiatric clerkship [10-12] but despite this,  
32 psychiatry as a career choice remains unpopular among students [13, 14]. Stigma towards  
33 mental illness has been increasingly identified as a potential factor that influences medical  
34 students’ attitudes towards psychiatry and deters them from choosing psychiatry as a  
35 career [15, 16]. The personality correlates of a career interest in psychiatry were also  
36 explored in a few studies [17-19].  
37  
38  
39  
40  
41  
42  
43  
44  
45  
46  
47  
48

49 The recruitment of medical students into the field of psychiatry is important to mental  
50 health educators and has also become an increasing priority of healthcare policy makers  
51 [20]. Given the multifactorial nature of a student’s specialty choice, understanding these  
52 factors could aid in the recruitment and mentoring strategies to increase the uptake and  
53 quality of students choosing psychiatry [21]. The current study, therefore, seeks to identify  
54  
55  
56  
57  
58  
59  
60

factors associated with a future choice of specialization in psychiatry among pre- and intra-medical school factors, perception of career aspects, attitudes towards psychiatry, stigma towards mental illness, and personality traits in a group of medical students from Singapore.

## **Methods**

### ***Study Participants***

All students enrolled in two of the medical schools (one undergraduate and one graduate medical school) in Singapore were invited to take part in a web-based survey administered in the English language via school email. The only other undergraduate medical school in Singapore was excluded as it had been recently established. A total of 502 students were recruited with quota limits set to ensure adequate and representative sampling of students from each involved institution and across their academic years. Online informed consent was administered prior to the survey. The study was approved by the ethics committee of the Domain Specific Review Board of the National Healthcare Group, Singapore.

### ***Patient and Public Involvement***

No patient was involved in this study.

### ***Instrument***

The main online questionnaire in the current study was adapted from a cross-sectional survey that aimed to investigate mostly pre- and intra- medical school factors which influence psychiatric career choice among medical students across 20 countries [6]. We also included additional scales to measure personality and stigma towards mental illnesses. The survey collected sociodemographic data and the following information on:

### ***Pre-Medical School Factors***

These included pre-medical school influences in choosing medicine and psychiatry (e.g., parents' wishes, wider family and friends' advices, close contact with a trusted doctor/nurse who is a family member or a close friend, portrayal of doctor/nurses in books, television and the media, personal and family experience of a physical illness or mental illness, prior work

1  
2  
3 experience), pre-medical school career choice, highest academic qualifications and subjects  
4 exposed to prior to admission (refer to Appendix A for the full list of subjects).  
5

### 6 7 ***Intra-Medical School Factors*** 8

9  
10 These included intra-medical school influences (e.g., academics and lectures, school advisors  
11 or tutors, clinicians during placement, other students in the same course), psychiatry-  
12 related enrichment activities (e.g., optional electives, psychiatry/mental health club and  
13 program, research experience, volunteering with mentally-ill patients), weeks of psychiatric  
14 training attended, clinical exposure factors including reported highest responsibility for  
15 patient care during placement and subjects taught at medical schools (refer to Appendix B).  
16  
17  
18  
19

### 20 21 ***Importance of Career Aspects in Choice of Specialty*** 22

23  
24 These included 12 individual factors namely academic opportunities, research opportunities,  
25 competition for training places, flexible working, job prospects, work-life balance,  
26 perception of competency, job satisfaction, likelihood of suffering emotional drain/burnout,  
27 pay, prestige among general public, high status among medicine, work-life balance,  
28 perception of competency, and job satisfaction. Participants were asked to rate whether  
29 each of these factors was important, not important, or indifferent in their choice of career.  
30  
31  
32  
33

### 34 35 ***Others*** 36

37  
38 Two validated instruments- the Attitude to Psychiatry Scale (ATP-18) and the Opening Minds  
39 Stigma Scale for Healthcare Providers (OMS-HC) were also used to measure stigma towards  
40 psychiatry and mental illness respectively. A principal component analysis of the ATP-18  
41 revealed a 3-factor structure which reflected 1) an unsympathetic view of psychiatry- its  
42 practitioners, patients and treatments, 2) dissatisfaction with the subject matter of  
43 psychiatry and 3) approval and interest in psychiatric skills and methods [22] while the OMS-  
44 HC favored a 3- factor structure which included 1) attitudes towards people with mental  
45 illness, 2) disclosure/ help-seeking and 3) social distance [23]. Finally, for the purpose of  
46 measuring the Big Five factors of personality (extraversion, agreeableness,  
47 conscientiousness, neuroticism and openness to experience) in our study, the Mini-  
48 International Personality Item Pool (mini-IPIP) [24] was included.  
49  
50  
51  
52  
53  
54  
55  
56  
57  
58  
59  
60

### ***Coding of Outcome Variable***

Participants were first asked to rate their likelihood of a career in various specialties—pediatrics, radiography, general practice/ primary care, clinical laboratory sciences, anaesthetics, obstetrics and gynaecology, accident and emergency medicine, surgery, psychiatry and general internal medicine—before proceeding to the remaining questionnaire. This variable was measured on a 5-point Likert-type scale (no way, unlikely, possible, seriously considering and definitely). As proposed by Farooq et al. [6], the use of this outcome as a continuous variable was not recommended given that it was a subjective ordinal variable and the distribution was also not normal. A preliminary analysis revealed a less than 10% response rate for students who had endorsed strong likelihood (seriously considering and definitely) for specializing in psychiatry and this would result in a low power for calculation. For the purpose of this study, we have therefore created a binary outcome, with students being “unlikely” to specialize in psychiatry (no way, unlikely) as the interest group versus students being “likely” to specialize in psychiatry (possible, seriously considering and definitely).

### **Statistical Analyses**

Statistical analyses were performed using IBM Statistical Package for the Social Science (SPSS) version 23.0. Statistical significance was set at  $p < 0.05$  level. Descriptive statistics were tabulated for the overall sample. Frequency and percentage were calculated for categorical variables, while mean and standard deviation were calculated for all other continuous variables. Chi-square tests and Independent t-tests were performed to analyze the effects of separate categorical and continuous variables respectively. A final multiple logistic regression was then performed to examine the factors associated with ‘not choosing’ psychiatry as a career. To avoid overloading the regression model, this analysis only included variables shown to have significant association with the outcome variable from the initial bivariate analyses. A backwards selection procedure was employed to allow elimination of non-significant variables one at a time, based on the probability of the Wald statistic, until only the statistically significant variables remained.

### **Results**



### ***Likelihood of Rejecting Psychiatry as a Career***

Only 4 students (0.8%) reported 'definitely decided to do', 43 (8.6%) reported 'seriously considering (i.e., top 3 choices), 174 (34.7%) reported 'possible, unsure yet', 199 (39.6%) reported 'unlikely' and 82 (16.3%) reported 'no way' with respect to psychiatry as a career choice. In terms of groupings, the majority (n=281, 56.0%) of the students were "unlikely" (no way, unlikely) to specialize in psychiatry while the rest were in the "likely" group (including those who reported 'definitely decided to do', 'seriously considering' and 'possible').

### ***Sociodemographic***

The sociodemographic characteristics and correlates are presented in Table 1. The respondents had a mean age of 22.4 years (SD=3.1, range=16 to 35) and were mainly females (58.8%), Chinese (93.0%), those who were in an undergraduate medical course (76.3%), had a monthly household income of below \$4,000 (37.1%) and were year 1 students (26.3%). Both age and the year of schooling were found to be factors associated with the likelihood of rejecting psychiatry.

### ***Pre-Medical School Factors***

Table 2 presents the pre-medical school factors associated with the likelihood of not specializing in psychiatry. Sources of influence that showed significant associations include having close contact with a trusted doctor or nurse, personal or family experience of a physical illness and of a mental illness. The lack of interest in psychiatry and the highest education level attained, both prior to admission, were also significant in predicting the rejection of psychiatry. Our analyses did not reveal significant association with any of the subjects listed in Appendix A.

### ***Intra-Medical School Factors***

Table 3 presents the intra-medical school factors associated with the likelihood of not specializing in psychiatry. Sources of influence that showed significant associations include academics or lectures and junior clinicians during placement. Having attended an optional elective in psychiatry and joined a psychiatry/ mental health club were associated with

1  
2  
3 choosing psychiatry as a career. Those who completed their clinical placement in psychiatry  
4 were less likely to specialise in psychiatry than those who did not. Weeks of psychiatry  
5 training received and level of responsibility in patient care were also significant factors for  
6 not choosing psychiatry. Our analysis did not reveal significant association with most  
7 subjects, except 'Neuroscience,' taken at medical school.  
8  
9

### 10 11 12 ***Career Prospects Associated with Psychiatry as a Career Choice*** 13

14 Of the 12 individual career prospects, analyses revealed that only those who perceived 'high  
15 status among medicine' as an important career aspect were more likely to be deterred from  
16 choosing psychiatry as a career (Table 4).  
17  
18

### 19 20 21 ***Attitude towards Psychiatry and Stigma against Mental Illness*** 22

23 Table 5 reveals that those who were unlikely to choose psychiatry had significantly lower  
24 ATP-18 score (greater negative attitudes towards psychiatry) and higher OMS-HC (greater  
25 stigma towards people with mental illness) score than their counterparts.  
26  
27

### 28 29 30 ***Personality*** 31

32 Among the self-rated personality traits, only agreeableness and neuroticism were found to  
33 be significant factors associated with psychiatry as a career on the mini-IPIP. Those who  
34 were unlikely to choose psychiatry scored significantly lower in these two personality traits.  
35 (Table 6).  
36  
37

### 38 39 40 ***Regression Analyses*** 41

42 Logistic regression was used to examine the effect of various factors upon likelihood of  
43 rejecting a career in psychiatry and nine factors remained significant (Table 7). Medical  
44 students who were unlikely to choose psychiatry as a career were significantly older  
45 (OR=1.18), had longer weeks of psychiatric training (OR=2.67 for those with  $\leq 5$  weeks and  
46 OR=2.60 for those with  $> 5$  weeks compared to those who did not receive any training), and  
47 were those who perceived a specialty which has 'high status in medicine' as important  
48 (OR=1.97), compared to those who were indifferent. Those who had close contact with a  
49 trusted doctor/nurse (OR=0.52), interest in psychiatry prior to admission (OR=0.05),  
50 postgraduate degree (OR=0.05; compared to pre-tertiary education) prior to admission,  
51  
52  
53  
54  
55  
56  
57

1  
2  
3 joined a psychiatry or mental health club (OR=0.24) were less likely to reject psychiatry as a  
4 career. Lastly, those who were unlikely to choose psychiatry had significantly lower ATP-18  
5 and neuroticism trait scores compared to their counterparts.  
6  
7

## 8 9 **Discussion**

10  
11 The current study attempts to examine the multiple factors identified from the literature  
12 that affect psychiatry as a career choice. These factors include pre-and intra- medical school  
13 influences, career aspects, attitude to psychiatry, stigma towards mental illness, and  
14 personality traits. While numerous studies have explored factors associated with choosing  
15 psychiatry as a career, none have looked into such extensive range of factors in a single  
16 study. A combination of student characteristics, values, needs, medical school experiences,  
17 and perception of specialties were found to influence the students' career decision in  
18 psychiatry in our sample.  
19  
20  
21  
22  
23  
24

### 25 26 ***Pre- and Intra- Medical School Factors***

27  
28 Both pre- and intra- medical school factors were found to influence students' choice of  
29 psychiatry as a career. Our study did reveal a considerable number of non-medical school  
30 factors such as pre-school influences, personality trait and importance of a high status  
31 specialty in medicine to be significant in affecting psychiatry as a career. Preference of  
32 specialty prior to medical school was also a strong predictor (OR=10.8) in the study by  
33 Farooq and colleagues, [6] where 78% of those who expressed interest in psychiatry when  
34 entering medical school remained likely to choose psychiatry during their final year. While  
35 we did find highest education attained prior to admission to be a factor, no association was  
36 found for students' qualification before medical school in Farooq's study. Our finding on  
37 higher neuroticism among those who were more likely to pursue a career in psychiatry was  
38 also supported by other studies that cited neuroticism or the presence of emotional  
39 disturbance as the central motivating factor in pursuing psychiatric practice [25, 26]. The  
40 underlying psychological conflict of these individuals who choose to become psychiatrists  
41 has been described as 'often severe but not necessarily of neurotic quality' and they may be  
42 searching for an answer to a strong inner drive that seeks to resolve the experienced  
43 conflict [27].  
44  
45  
46  
47  
48  
49  
50  
51  
52  
53  
54  
55  
56  
57  
58  
59  
60

1  
2  
3 Manassis et al. [28] had identified the most influential career choice factors by psychiatry  
4 residents to be initial interest, clerkship experiences and enrichment activities. Similarly, we  
5 found enrichment activities such as joining a mental health/ psychiatry club ( $p=0.005$ ) and  
6 attending optional courses/ modules/ electives ( $p=0.05$ ) to be influential factors in our final  
7 logistic regression. Again, these were two of the six variables that remained significantly  
8 associated with students being likely to pursue psychiatry as a career in the regression  
9 model of Farooq's study. Studies have also emphasized developing and improving specific  
10 enrichment activities such as electives or university psychiatry societies to further enhance  
11 recruitment to psychiatry [29-31]. None of the pre-school subjects or modules/ courses  
12 taken at medical school were found to be associated with the decision to choose psychiatry  
13 as a career choice, although those who took neuroscience were more likely to not choose  
14 psychiatry at univariate analysis. Goldenberg and Krystal found that medical students with  
15 an undergraduate neuroscience majors preferred to specialize in neurology (21.5%),  
16 neurosurgery (13.1%) or internal medicine (11%) compared to only 2.3% who preferred  
17 psychiatry at matriculation [32].

18  
19  
20  
21  
22  
23  
24  
25  
26  
27  
28  
29  
30  
31  
32  
33  
34  
35  
36  
37  
38  
39  
40  
41  
42  
43  
44  
45  
46  
47  
48  
49  
50  
51  
52  
53  
54  
55  
56  
57  
58  
59  
60  
With respect to clerkship experience, our study may imply that those who were exposed to  
a clinical placement were more likely to not choose psychiatry as a career choice although  
the result was not significant in the multivariable analysis. A study among local medical  
students revealed positive attitudinal change but worsening associative stigma towards  
psychiatry following a clinical rotation and suggested that stigma relating to psychiatry could  
be the main cause for a lack of consideration of psychiatry as a career [11]. One possibility  
could be that the medical students undergoing clinical rotation in psychiatry in Singapore  
were generally exposed to sicker and more chronic patients which led them to view  
psychiatry more negatively. Such negative experiences encountered during clinical exposure  
during the students' medical school years could lead them to narrow their medical specialty  
options. However, further qualitative research may be required to establish the underlying  
reasons.

### ***Societal Stigma***

Studies have generally found that medical students considering a career in psychiatry tend  
to be exposed to stigmatizing comments by others including family members and friends, or

1  
2  
3 the general public on their career choice and therefore, alienating themselves from  
4 psychiatry as a career [9, 33]. However, our study did not find any significant influences due  
5 to parents' wishes, wider family and friends' advice, prestige among general public or even  
6 other students in the same course. Rather, our data has revealed factors such as the  
7 influence of junior clinicians (but not senior clinicians) during placements and having close  
8 contact with a trusted doctor/ nurse who could be a family member or close friend to be  
9 significant in influencing a career in psychiatry. This probably suggests that the medical  
10 students in our sample may be more influenced potentially by contact with healthcare  
11 professionals whom they have a stronger sense of connection with compared to those from  
12 their social networks.  
13  
14  
15  
16  
17  
18  
19  
20

### 21 ***Attitudes towards Psychiatry and Stigma towards Mental Illness***

22  
23 The ATP-18 explores academic and clinical domains as well as perceptions of psychiatrists  
24 and psychiatric patients [22] while the OMS-HC assesses stigma and behavioural  
25 discrimination towards people with mental illness among healthcare workers [23]. Our  
26 study showed that those who were likely to reject psychiatry as a career were those who  
27 had lower ATP-18 score and higher OMS-HC score at univariate analyses. Multivariate  
28 analysis, however, revealed that only ATP-18 score were significant in predicting the  
29 likelihood of not choosing psychiatry as a career. This may suggest that medical students in  
30 our sample were more likely to reject psychiatry as a career mainly due to their  
31 dissatisfaction with psychiatric practice but not because they had a stigmatizing attitude  
32 towards patients with mental illness or mental illness itself. Our data on ATP-18 was  
33 consistent with past research [6, 34] showing that those who were likely to specialize in  
34 psychiatry had a higher ATP score or a more positive attitude towards psychiatry. While  
35 strategies on teaching practices such as the exposure to and taking responsibility for  
36 patients who are motivated and recovering, as well as co-taught seminars by both patients  
37 and professionals to improve medical students' attitudes towards psychiatry have been  
38 proposed [26, 35], studies also found that changes in education environment may not  
39 necessarily lead to significant increase in the number of students wanting to pursue  
40 psychiatry [11, 36].  
41  
42  
43  
44  
45  
46  
47  
48  
49  
50  
51  
52  
53

### 54 ***Limitations***

1  
2  
3 The current study is cross-sectional, and is therefore unable to establish causal relationship  
4 between the various factors and likelihood of rejecting psychiatry as a career. For instance,  
5 it may be possible that those who were interested in or had decided on choosing psychiatry  
6 as a career had also joined the mental health or psychiatry club in their school due to their  
7 interest. The lack of qualitative data may have also limited our understanding of how these  
8 students were being influenced by their contact with junior clinicians and trusted  
9 doctor/nurse, along with the larger-scale cultural issues that might affect their decision to  
10 specialize in psychiatry. We are unable to determine the response rate of the study as we do  
11 not know how many students had seen the email invitation but decided not to take part in  
12 the study. Furthermore, the current study only looked at medical students' likelihood of  
13 choosing psychiatry as career choice in the future and this may not reflect their actual  
14 decisions upon graduation. Nonetheless, one study had found the stability of psychiatry  
15 specialty choice from matriculation to graduation to be at slightly above 50%, which was  
16 greater than for any other specialties [37].  
17  
18  
19  
20  
21  
22  
23  
24  
25  
26

### 27 **Conclusion**

28  
29  
30 In Singapore, a graduating medical student would apply to a residency programme in  
31 accordance to his choice of medical speciality although there is a selection process where  
32 the candidate would be assessed through various ways for his or her suitability for that  
33 speciality. Our study has revealed a low interest among medical students wanting to  
34 specialize in psychiatry. However, there is a pool of 8.6% of students who would seriously  
35 consider psychiatry as a career and this may be the group that could possibly be targeted at  
36 to encourage recruitment into the field. While it may not be feasible to change aspects of  
37 pre-medical school influences, medical schools and psychiatry institutes could play a more  
38 critical role by improving clerkship experience or enhancing enrichment activities to bring  
39 about a more positive attitudinal change towards psychiatry in this group of students.  
40  
41  
42  
43  
44  
45  
46

### 47 **Contributors**

48  
49  
50 LSES wrote the first draft of the article and conducted statistical analyses. BYC, HLO and ES  
51 made substantial contribution to the acquisition of data and provided intellectual input. RM,  
52 SV, SAC and MS had contributed to the conception and design and provided intellectual  
53 input. All authors have given final approval of the version to be published.  
54  
55  
56  
57  
58  
59  
60

**Funding**

This research is supported by the Singapore Ministry of Health's National Medical Research Council under the Centre Grant Programme (Grant No.: NMRC/CG/004/2013).

**Competing interests**

The authors declare that they have no competing interests.

**Ethics approval and consent to participate**

The study was approved by the ethics committee of the Domain Specific Review Board of the National Healthcare Group, Singapore. All student participants have provided online consent to the study.

**Provenance and peer review**

Not commissioned; externally peer reviewed.

**Data sharing statement**

For access to data, please approach Associate Professor Mythily Subramaniam via [mythily@imh.com.sg](mailto:mythily@imh.com.sg).

**Table 1:** Socio-demographic profile (n=502)

|                          |                      | Total |      | Likely |      | Unlikely |      | p-value |
|--------------------------|----------------------|-------|------|--------|------|----------|------|---------|
|                          |                      | Mean  | S.D. | Mean   | S.D. | Mean     | S.D. |         |
| Age in years             |                      | 22.44 | 3.06 | 21.81  | 3.07 | 22.93    | 2.96 | <0.001  |
|                          |                      | N     | %    | N      | %    | N        | %    |         |
| Gender                   | Male                 | 207   | 41.2 | 85     | 41.1 | 122      | 58.9 | 0.263   |
|                          | Female               | 295   | 58.8 | 136    | 46.1 | 159      | 53.9 |         |
| Education                | Undergraduate        | 383   | 76.3 | 177    | 46.2 | 206      | 53.8 | 0.076   |
|                          | Postgraduate         | 119   | 23.7 | 44     | 37.0 | 75       | 63.0 |         |
| Monthly Household income | Below 4,000          | 186   | 37.1 | 91     | 48.9 | 95       | 51.1 | 0.193   |
|                          | 4,000-9,999          | 177   | 35.3 | 70     | 39.5 | 107      | 60.5 |         |
|                          | 10,000 & above       | 139   | 27.7 | 60     | 43.2 | 79       | 56.8 |         |
| Year of schooling        | 1 <sup>st</sup> year | 132   | 26.3 | 77     | 58.3 | 55       | 41.7 | <0.001  |
|                          | 2 <sup>nd</sup> year | 116   | 23.1 | 57     | 49.1 | 59       | 50.9 |         |
|                          | 3 <sup>rd</sup> year | 71    | 14.1 | 31     | 43.7 | 40       | 56.3 |         |
|                          | 4 <sup>th</sup> year | 87    | 17.3 | 32     | 36.8 | 55       | 63.2 |         |
|                          | 5 <sup>th</sup> year | 96    | 19.1 | 24     | 25.0 | 72       | 75.0 |         |

**Table 2:** Pre-medical school influences in affecting likelihood of choosing psychiatry

|                                                               |     | Likely |      | Unlikely |      | p-value             |
|---------------------------------------------------------------|-----|--------|------|----------|------|---------------------|
|                                                               |     | N      | %    | N        | %    |                     |
| Parents' wishes                                               | Yes | 11     | 42.3 | 15       | 57.7 | 0.856               |
|                                                               | No  | 210    | 44.1 | 266      | 55.9 |                     |
| Wider family & friends' advices                               | Yes | 29     | 51.8 | 27       | 48.2 | 0.214               |
|                                                               | No  | 192    | 43.0 | 254      | 57.0 |                     |
| A trusted doctor/ nurse who has close contact with you        | Yes | 39     | 57.4 | 29       | 42.6 | 0.017               |
|                                                               | No  | 182    | 41.9 | 252      | 58.1 |                     |
| Portrayal of doctors/ nurses in books, television & the media | Yes | 30     | 48.4 | 32       | 51.6 | 0.460               |
|                                                               | No  | 191    | 43.4 | 249      | 56.6 |                     |
| Personal/family experience of a physical illness              | Yes | 40     | 56.3 | 31       | 43.7 | 0.024               |
|                                                               | No  | 181    | 42.0 | 250      | 58.0 |                     |
| Personal/family experience of a mental illness                | Yes | 25     | 71.4 | 10       | 28.6 | 0.001               |
|                                                               | No  | 196    | 42.0 | 271      | 58.0 |                     |
| Prior work experience                                         | Yes | 51     | 48.6 | 54       | 51.4 | 0.291               |
|                                                               | No  | 170    | 42.8 | 227      | 57.2 |                     |
| Interest in psychiatry prior to                               | Yes | 19     | 95.0 | 1        | 5.0  | <0.001 <sup>a</sup> |



## Career in Psychiatry

|                                               |               |     |      |     |      |              |
|-----------------------------------------------|---------------|-----|------|-----|------|--------------|
| admission                                     | No            | 202 | 41.9 | 280 | 58.1 | <b>0.033</b> |
| Highest education attained prior to admission | Pre-tertiary  | 177 | 46.2 | 206 | 53.8 |              |
|                                               | Undergraduate | 35  | 33.7 | 69  | 66.3 |              |
|                                               | Postgraduate  | 9   | 60.0 | 6   | 40.0 |              |

<sup>a</sup> p-value determined by Fisher's Exact Test

**Table 3:** Intra-medical school influences in affecting likelihood of choosing psychiatry

|                                                  |                                                    | Likely |      | Unlikely |      | p-value          |
|--------------------------------------------------|----------------------------------------------------|--------|------|----------|------|------------------|
|                                                  |                                                    | N      | %    | N        | %    |                  |
| Academics or lectures                            | Yes                                                | 96     | 51.3 | 91       | 48.7 | <b>0.011</b>     |
|                                                  | No                                                 | 125    | 39.7 | 190      | 60.3 |                  |
| School advisors or tutors                        | Yes                                                | 81     | 42.9 | 108      | 57.1 | 0.682            |
|                                                  | No                                                 | 140    | 44.7 | 173      | 55.3 |                  |
| Senior clinicians during placements              | Yes                                                | 91     | 40.6 | 133      | 59.4 | 0.168            |
|                                                  | No                                                 | 130    | 46.8 | 148      | 53.2 |                  |
| Junior clinicians during placements              | Yes                                                | 55     | 36.4 | 96       | 63.6 | <b>0.024</b>     |
|                                                  | No                                                 | 166    | 47.3 | 185      | 52.7 |                  |
| Other students in the same course                | Yes                                                | 30     | 46.2 | 35       | 53.8 | 0.711            |
|                                                  | No                                                 | 191    | 43.7 | 246      | 56.3 |                  |
| Attended optional courses/ modules/ electives    | Yes                                                | 32     | 58.2 | 23       | 41.8 | <b>0.025</b>     |
|                                                  | No                                                 | 189    | 42.3 | 258      | 57.7 |                  |
| Joined psychiatry/ mental health club            | Yes                                                | 22     | 73.3 | 8        | 26.7 | <b>0.001</b>     |
|                                                  | No                                                 | 199    | 42.2 | 273      | 57.8 |                  |
| Joined student wellness/ mental health programme | Yes                                                | 79     | 44.6 | 98       | 55.4 | 0.839            |
|                                                  | No                                                 | 142    | 43.7 | 183      | 56.3 |                  |
| Research experience in psychiatry                | Yes                                                | 15     | 60.0 | 10       | 40.0 | 0.099            |
|                                                  | No                                                 | 206    | 43.2 | 271      | 56.8 |                  |
| Volunteered with mentally-ill patients           | Yes                                                | 15     | 38.5 | 24       | 61.5 | 0.466            |
|                                                  | No                                                 | 206    | 44.5 | 257      | 55.5 |                  |
| Weeks of psychiatric training                    | 0 week                                             | 153    | 55.2 | 125      | 44.8 | <b>&lt;0.001</b> |
|                                                  | ≤5 weeks                                           | 24     | 29.6 | 57       | 70.4 |                  |
|                                                  | >5 weeks                                           | 43     | 30.3 | 99       | 69.7 |                  |
| Completed clinical placement in psychiatry       | Yes                                                | 56     | 29.6 | 133      | 70.4 | <b>&lt;0.001</b> |
|                                                  | No                                                 | 165    | 52.7 | 148      | 47.3 |                  |
| Level of responsibility in patient care          | No responsibility or asked opinion                 | 176    | 51.9 | 163      | 48.1 | <b>&lt;0.001</b> |
|                                                  | Clerking/assess risk/ do therapy under supervision | 45     | 27.6 | 118      | 72.4 |                  |
| Took Neuroscience                                | Yes                                                | 154    | 41.0 | 222      | 59.0 | <b>0.017</b>     |
|                                                  | No                                                 | 67     | 53.2 | 59       | 46.8 |                  |

**Table 4:** Importance of career aspects in affecting likelihood of choosing psychiatry

| Factor                          | Important? | Likely |      | Unlikely |      | p-value      |
|---------------------------------|------------|--------|------|----------|------|--------------|
|                                 |            | N      | %    | N        | %    |              |
| Academic opportunities          | Yes        | 97     | 45.1 | 118      | 54.9 | 0.908        |
|                                 | No         | 32     | 42.7 | 43       | 57.3 |              |
|                                 | Neutral    | 92     | 43.4 | 120      | 56.6 |              |
| Research opportunities          | Yes        | 66     | 46.2 | 77       | 53.8 | 0.827        |
|                                 | No         | 54     | 43.5 | 70       | 56.5 |              |
|                                 | Neutral    | 101    | 43.0 | 134      | 57.0 |              |
| Competition for training places | Yes        | 128    | 44.4 | 160      | 55.6 | 0.975        |
|                                 | No         | 19     | 43.2 | 25       | 56.8 |              |
|                                 | Neutral    | 74     | 43.5 | 96       | 56.5 |              |
| Flexible working                | Yes        | 155    | 44.0 | 197      | 56.0 | 0.723        |
|                                 | No         | 10     | 37.0 | 17       | 63.0 |              |
|                                 | Neutral    | 56     | 45.5 | 67       | 54.5 |              |
| Job prospects                   | Yes        | 164    | 43.2 | 216      | 56.8 | 0.788        |
|                                 | No         | 8      | 47.1 | 9        | 52.9 |              |
|                                 | Neutral    | 49     | 46.7 | 56       | 53.3 |              |
| Emotional drain/ burnout        | Yes        | 176    | 43.9 | 225      | 56.1 | 0.633        |
|                                 | No         | 5      | 33.3 | 10       | 66.7 |              |
|                                 | Neutral    | 40     | 46.5 | 46       | 53.5 |              |
| Salary/ Pay                     | Yes        | 82     | 39.6 | 125      | 60.4 | 0.212        |
|                                 | No         | 36     | 50.0 | 26       | 50.0 |              |
|                                 | Neutral    | 103    | 46.2 | 120      | 53.8 |              |
| Prestige among general public   | Yes        | 39     | 35.5 | 71       | 64.5 | 0.101        |
|                                 | No         | 74     | 48.4 | 79       | 51.6 |              |
|                                 | Neutral    | 108    | 45.2 | 131      | 54.8 |              |
| High status among medicine      | Yes        | 31     | 32.6 | 64       | 67.4 | <b>0.041</b> |
|                                 | No         | 79     | 45.4 | 95       | 54.6 |              |
|                                 | Neutral    | 111    | 47.6 | 122      | 52.4 |              |
| Work-life balance               | Yes        | 176    | 43.3 | 230      | 56.7 | 0.792        |
|                                 | No         | 8      | 50.0 | 8        | 50.0 |              |
|                                 | Neutral    | 37     | 46.3 | 43       | 53.8 |              |
| Perception of competency        | Yes        | 92     | 42.4 | 125      | 57.6 | 0.811        |
|                                 | No         | 32     | 45.7 | 38       | 54.3 |              |
|                                 | Neutral    | 97     | 45.1 | 118      | 54.9 |              |

## Career in Psychiatry

|                  |         |     |      |     |      |       |
|------------------|---------|-----|------|-----|------|-------|
| Job satisfaction | Yes     | 186 | 42.2 | 253 | 57.6 | 0.053 |
|                  | No      | 4   | 36.4 | 7   | 63.6 |       |
|                  | Neutral | 31  | 59.6 | 21  | 40.4 |       |

**Table 5:** Attitudes towards psychiatry and stigma towards people with mental illness in affecting likelihood of choosing psychiatry

|               | Likely       | Unlikely     | p-value |
|---------------|--------------|--------------|---------|
|               | Mean (S.D.)  | Mean (S.D.)  |         |
| ATP-18 scores | 66.66 (5.49) | 63.50 (6.08) | <0.001  |
| OMS-HC scores | 36.87 (6.59) | 39.10 (6.69) | <0.001  |

**Table 6:** Personality traits in affecting likelihood of choosing psychiatry

|                        | Likely |      | Unlikely |      | p-value |
|------------------------|--------|------|----------|------|---------|
|                        | Mean   | S.D. | Mean     | S.D. |         |
| Extraversion           | 11.19  | 3.65 | 11.47    | 3.58 | 0.397   |
| Agreeableness          | 16.35  | 2.26 | 15.63    | 2.38 | 0.001   |
| Conscientiousness      | 13.50  | 3.28 | 14.08    | 3.24 | 0.050   |
| Neuroticism            | 11.64  | 3.43 | 10.75    | 3.16 | 0.003   |
| Intellect/ Imagination | 14.57  | 3.02 | 14.69    | 3.09 | 0.662   |

**Table 7:** Logistic regression examining factors with not choosing psychiatry as a career\*

| Factor                                                 | Category     | Odds Ratio | 95% C.I. | 95% C.I. | P-value |
|--------------------------------------------------------|--------------|------------|----------|----------|---------|
|                                                        |              |            | Lower    | Lower    |         |
| Age (in years)                                         |              | 1.18       | 1.02     | 1.36     | 0.029   |
| A trusted doctor/ nurse who has close contact with you | Yes          | 0.52       | 0.28     | 0.94     | 0.030   |
|                                                        | No           | Ref.       | -        | -        | -       |
| Interest in psychiatry prior to admission              | Yes          | 0.05       | 0.01     | 0.38     | 0.004   |
|                                                        | No           | Ref.       | -        | -        | -       |
| Highest education attained prior to admission          | Postgraduate | 0.05       | 0.01     | 0.34     | 0.002   |
|                                                        | Pre-tertiary | Ref.       | -        | -        | -       |
| Joined psychiatry/mental health club                   | Yes          | 0.24       | 0.09     | 0.64     | 0.005   |
|                                                        | No           | Ref.       | -        | -        | -       |
| Weeks of psychiatric training                          | 0 week       | Ref.       | -        | -        | -       |
|                                                        | ≤5 weeks     | 2.67       | 1.21     | 5.91     | 0.015   |
|                                                        | >5 weeks     | 2.60       | 1.44     | 4.70     | 0.002   |
| High status among medicine                             | Important    | 1.97       | 1.10     | 3.51     | 0.022   |

|              | Indifferent | Ref. | -    | -    | -      |
|--------------|-------------|------|------|------|--------|
| ATP-18 score |             | 0.92 | 0.88 | 0.96 | <0.001 |
| Neuroticism  |             | 0.92 | 0.86 | 0.98 | 0.009  |

\*Backwards selection procedure, variables entered initially: age, stage of schooling, having close contact with a trusted doctor/nurse, personal/ family experience of a physical and mental illness, interest in psychiatry and highest education attained prior to admission, academic and lectures, junior clinicians during placement, optional courses and electives, mental health club membership, weeks of psychiatric training received, clinical placement, level of responsibility in psychiatric patient care, neuroscience module, high status among medicine, ATP-18 score, OMS-HC score, agreeableness and neuroticism.

## References

1. Sayers, J., *The world health report 2001 — Mental health: new understanding, new hope*. Bull World Health Organ, 2001. **79**(11): p. 1085.
2. Katschnig, H., *Are psychiatrists an endangered species? Observations on internal*. World Psychiatry, 2010. **9**(1): p. 21-8.
3. Tamaskar, P. and R.A. McGinnis, *Declining student interest in psychiatry*. JAMA, 2002. **287**(14): p. 1859.
4. Salsberg, E., et al., *US residency training before and after the 1997 Balanced Budget Act*. JAMA, 2008. **300**(10): p. 1174-80.
5. Halder, N., et al., *Student career choice in psychiatry: findings from 18 UK medical schools*. Int Rev Psychiatry, 2013. **25**(4): p. 438-44.
6. Farooq, K., et al., *Why medical students choose psychiatry - a 20 country cross-sectional survey*. BMC Med Educ, 2014. **14**: p. 12.
7. Farooq, K., G.J. Lydall, and D. Bhugra, *What attracts medical students towards psychiatry? A review of factors before and during medical school*. Int Rev Psychiatry, 2013. **25**(4): p. 371-7.
8. Balon, R., et al., *Medical Students' Attitudes and Views of Psychiatry*. Academic Psychiatry, 1999. **23**(1): p. 30-36.
9. Wiesenfeld, L., et al., *Choosing Psychiatry as a Career: Motivators and Deterrents at a Critical Decision-Making Juncture*. Can J Psychiatry, 2014. **59**(8): p. 450-4.
10. Ndeti, D.M., et al., *Attitudes toward psychiatry: a survey of medical students at the University of Nairobi, Kenya*. Acad Psychiatry, 2008. **32**(2): p. 154-9.
11. Mahendran, R., et al., *The impact of the educational environment on career choice and attitudes toward psychiatry*. Med Teach, 2015. **37**(5): p. 494-7.
12. Kuhnigk, O., et al., *Attitudes of Medical Students Towards Psychiatry*. Advances in Health Sciences Education, 2007. **12**(1): p. 87-101.
13. Lyons, Z., *Impact of the psychiatry clerkship on medical student attitudes towards psychiatry and to psychiatry as a career*. Acad Psychiatry, 2014. **38**(1): p. 35-42.
14. Lyons, Z., *Attitudes of medical students toward psychiatry and psychiatry as a career: a systematic review*. Acad Psychiatry, 2013. **37**(3): p. 150-7.
15. Dixon, R.P., et al., *Medical students' attitudes to psychiatric illness in primary care*. Med Educ, 2008. **42**(11): p. 1080-7.
16. Lyons, Z., et al., *Stigma towards mental illness among medical students in Australia and Ghana*. Acad Psychiatry, 2015. **39**(3): p. 305-8.
17. Walton, H.J., *Personality correlates of a career interest in psychiatry*. Br J Psychiatry, 1969. **115**(519): p. 211-9.
18. Mowbray, R.M., B.M. Davies, and N. Biddle, *Psychiatry as a career choice*. Aust N Z J Psychiatry, 1990. **24**(1): p. 57-64.
19. Monleon Moscardo, P.J., et al., *[Personality factors and psychiatry specialty attraction]*. Actas Esp Psiquiatr, 2001. **29**(1): p. 14-8.

- 1
  - 2
  - 3
  - 4
  - 5
  - 6
  - 7
  - 8
  - 9
  - 10
  - 11
  - 12
  - 13
  - 14
  - 15
  - 16
  - 17
  - 18
  - 19
  - 20
  - 21
  - 22
  - 23
  - 24
  - 25
  - 26
  - 27
  - 28
  - 29
  - 30
  - 31
  - 32
  - 33
  - 34
  - 35
  - 36
  - 37
  - 38
  - 39
  - 40
  - 41
  - 42
  - 43
  - 44
  - 45
  - 46
  - 47
  - 48
  - 49
  - 50
  - 51
  - 52
  - 53
  - 54
  - 55
  - 56
  - 57
  - 58
  - 59
  - 60
20. Hoge, M.A., et al., *Mental health and addiction workforce development: federal leadership is needed to address the growing crisis*. Health Aff (Millwood), 2013. **32**(11): p. 2005-12.
21. Sierles, F.S., J. Yager, and S.H. Weissman, *Recruitment of U.S. medical graduates into psychiatry: reasons for optimism, sources of concern*. Acad Psychiatry, 2003. **27**(4): p. 252-9.
22. Wilkinson, D.G., B.K. Toone, and S. Greer, *Medical students' attitudes to psychiatry at the end of the clinical curriculum*. Psychol Med, 1983. **13**(3): p. 655-8.
23. Modgill, G., et al., *Opening Minds Stigma Scale for Health Care Providers (OMS-HC): examination of psychometric properties and responsiveness*. BMC Psychiatry, 2014. **14**: p. 120.
24. Donnellan, M.B., et al., *The mini-IPIP scales: tiny-yet-effective measures of the Big Five factors of personality*. Psychol Assess, 2006. **18**(2): p. 192-203.
25. Maron, B.A., et al., *Ability of prospective assessment of personality profiles to predict the practice specialty of medical students*. Proc (Bayl Univ Med Cent), 2007. **20**(1): p. 22-6.
26. Eagle, P.F. and L.R. Marcos, *Factors in medical students' choice of psychiatry*. Am J Psychiatry, 1980. **137**(4): p. 423-7.
27. Ford, E.S., *Being and becoming a psychotherapist: the search for identity*. Am J Psychother, 1963. **17**: p. 472-82.
28. Manassis, K., et al., *Choosing a career in psychiatry: influential factors within a medical school program*. (1042-9670 (Print)).
29. Mihalyuk, T., et al., *Free choice and career choice: Clerkship electives in medical education*. Med Educ, 2006. **40**(11): p. 1065-71.
30. Weintraub, W., S.M. Plaut, and E. Weintraub, *Recruitment into psychiatry: increasing the pool of applicants*. Can J Psychiatry, 1999. **44**(5): p. 473-7.
31. Lyons, Z., *Establishment and implementation of a psychiatry enrichment programme for medical students*. Australasian Psychiatry, 2016: p. 1039856216671663.
32. Goldenberg, M.N. and J.H. Krystal, *Undergraduate Neuroscience Majors: A Missed Opportunity for Psychiatry Workforce Development*. Acad Psychiatry, 2017. **41**(2): p. 239-242.
33. Roberts Lw Fau - Bandstra, B.S. and B.S. Bandstra, *Addressing stigma to strengthen psychiatric education*. (1545-7230 (Electronic)).
34. Maidment, R., et al., *Carry on shrinking: career intentions and attitudes to psychiatry of prospective medical students*. Psychiatric Bulletin, 2003. **27**(1): p. 30-32.
35. Coodin, S. and F. Chisholm, *Teaching in a new key: effects of a co-taught seminar on medical students' attitudes toward schizophrenia*. Psychiatr Rehabil J, 2001. **24**(3): p. 299-302.
36. Tharyan, P., et al., *Attitudes of 'tomorrow's doctors' towards psychiatry and mental illness*. Natl Med J India, 2001. **14**(6): p. 355-9.
37. Matthew N. Goldenberg, D. Keith Williams, and John J. Spollen, *Stability of and Factors Related to Medical Student Specialty Choice of Psychiatry*. American Journal of Psychiatry, 2017. **174**(9): p. 859-866.

1  
2  
3  
4  
5  
6  
7  
8  
9  
10  
11  
12  
13  
14  
15  
16  
17  
18  
19  
20  
21  
22  
23  
24  
25  
26  
27  
28  
29  
30  
31  
32  
33  
34  
35  
36  
37  
38  
39  
40  
41  
42  
43  
44  
45  
46  
47  
48  
49  
50  
51  
52  
53  
54  
55  
56  
57  
58  
59  
60

For peer review only

1  
2  
3 **Appendix A**  
4

5 Which subjects have you been exposed to before entering your current school?  
6

7  
8  
9  
10  
11  
12  
13  
14  
15  
16  
17

|                             |                   |                        |
|-----------------------------|-------------------|------------------------|
| Economics                   | Psychology        | Philosophy             |
| Sociology                   | Modern Languages  | History                |
| Accounting/Finance/Business | Art/Design        | Classical Languages    |
| Chemistry                   | Geography         | Information Technology |
| Technology                  | Physics           | Music                  |
| Performing Arts             | General Studies   | Mathematics            |
| Politics                    | Religious Studies | Biology                |
| English                     | Sports Science    |                        |

18  
19  
20 **Appendix B**  
21

22 Which of the following subjects/ courses have you been taught at your medical school?  
23

24  
25  
26  
27  
28  
29  
30  
31  
32  
33  
34  
35  
36  
37  
38  
39  
40  
41  
42  
43  
44  
45  
46  
47  
48  
49  
50  
51  
52  
53  
54  
55  
56  
57  
58  
59  
60

|                     |                                                     |            |
|---------------------|-----------------------------------------------------|------------|
| Behavioral Sciences | Philosophy                                          | Psychology |
| Ethics              | Communication Skills                                | Sociology  |
| Neuroscience        | Other psychiatry and mental health related subjects |            |

**STROBE 2007 (v4) Statement—Checklist of items that should be included in reports of *cross-sectional studies***

| Section/Topic                | Item # | Recommendation                                                                                                                                                                       | Reported on page # |
|------------------------------|--------|--------------------------------------------------------------------------------------------------------------------------------------------------------------------------------------|--------------------|
| <b>Title and abstract</b>    | 1      | (a) Indicate the study’s design with a commonly used term in the title or the abstract                                                                                               | 1                  |
|                              |        | (b) Provide in the abstract an informative and balanced summary of what was done and what was found                                                                                  | 2                  |
| <b>Introduction</b>          |        |                                                                                                                                                                                      |                    |
| Background/rationale         | 2      | Explain the scientific background and rationale for the investigation being reported                                                                                                 | 4                  |
| Objectives                   | 3      | State specific objectives, including any prespecified hypotheses                                                                                                                     | 5                  |
| <b>Methods</b>               |        |                                                                                                                                                                                      |                    |
| Study design                 | 4      | Present key elements of study design early in the paper                                                                                                                              | 5                  |
| Setting                      | 5      | Describe the setting, locations, and relevant dates, including periods of recruitment, exposure, follow-up, and data collection                                                      | 5                  |
| Participants                 | 6      | (a) Give the eligibility criteria, and the sources and methods of selection of participants                                                                                          | 5                  |
| Variables                    | 7      | Clearly define all outcomes, exposures, predictors, potential confounders, and effect modifiers. Give diagnostic criteria, if applicable                                             | 5-7                |
| Data sources/<br>measurement | 8*     | For each variable of interest, give sources of data and details of methods of assessment (measurement). Describe comparability of assessment methods if there is more than one group | 5-7                |
| Bias                         | 9      | Describe any efforts to address potential sources of bias                                                                                                                            | 5                  |
| Study size                   | 10     | Explain how the study size was arrived at                                                                                                                                            | NA                 |
| Quantitative variables       | 11     | Explain how quantitative variables were handled in the analyses. If applicable, describe which groupings were chosen and why                                                         | 6-7                |
| Statistical methods          | 12     | (a) Describe all statistical methods, including those used to control for confounding                                                                                                | 7                  |
|                              |        | (b) Describe any methods used to examine subgroups and interactions                                                                                                                  | 7                  |
|                              |        | (c) Explain how missing data were addressed                                                                                                                                          | NA                 |
|                              |        | (d) If applicable, describe analytical methods taking account of sampling strategy                                                                                                   | NA                 |
|                              |        | (e) Describe any sensitivity analyses                                                                                                                                                | NA                 |
| <b>Results</b>               |        |                                                                                                                                                                                      |                    |



|                          |     |                                                                                                                                                                                                              |       |
|--------------------------|-----|--------------------------------------------------------------------------------------------------------------------------------------------------------------------------------------------------------------|-------|
| Participants             | 13* | (a) Report numbers of individuals at each stage of study—eg numbers potentially eligible, examined for eligibility, confirmed eligible, included in the study, completing follow-up, and analysed            | 5     |
|                          |     | (b) Give reasons for non-participation at each stage                                                                                                                                                         | NA    |
|                          |     | (c) Consider use of a flow diagram                                                                                                                                                                           | NA    |
| Descriptive data         | 14* | (a) Give characteristics of study participants (eg demographic, clinical, social) and information on exposures and potential confounders                                                                     | 8     |
|                          |     | (b) Indicate number of participants with missing data for each variable of interest                                                                                                                          | NA    |
| Outcome data             | 15* | Report numbers of outcome events or summary measures                                                                                                                                                         | 7     |
| Main results             | 16  | (a) Give unadjusted estimates and, if applicable, confounder-adjusted estimates and their precision (eg, 95% confidence interval). Make clear which confounders were adjusted for and why they were included | 7     |
|                          |     | (b) Report category boundaries when continuous variables were categorized                                                                                                                                    | 6-7   |
|                          |     | (c) If relevant, consider translating estimates of relative risk into absolute risk for a meaningful time period                                                                                             | NA    |
| Other analyses           | 17  | Report other analyses done—eg analyses of subgroups and interactions, and sensitivity analyses                                                                                                               | 7-9   |
| <b>Discussion</b>        |     |                                                                                                                                                                                                              |       |
| Key results              | 18  | Summarise key results with reference to study objectives                                                                                                                                                     | 9-10  |
| Limitations              | 19  | Discuss limitations of the study, taking into account sources of potential bias or imprecision. Discuss both direction and magnitude of any potential bias                                                   | 12    |
| Interpretation           | 20  | Give a cautious overall interpretation of results considering objectives, limitations, multiplicity of analyses, results from similar studies, and other relevant evidence                                   | 12-13 |
| Generalisability         | 21  | Discuss the generalisability (external validity) of the study results                                                                                                                                        | NA    |
| <b>Other information</b> |     |                                                                                                                                                                                                              |       |
| Funding                  | 22  | Give the source of funding and the role of the funders for the present study and, if applicable, for the original study on which the present article is based                                                | 13    |

\*Give information separately for cases and controls in case-control studies and, if applicable, for exposed and unexposed groups in cohort and cross-sectional studies.

**Note:** An Explanation and Elaboration article discusses each checklist item and gives methodological background and published examples of transparent reporting. The STROBE checklist is best used in conjunction with this article (freely available on the Web sites of PLoS Medicine at <http://www.plosmedicine.org/>, Annals of Internal Medicine at <http://www.annals.org/>, and Epidemiology at <http://www.epidem.com/>). Information on the STROBE Initiative is available at [www.strobe-statement.org](http://www.strobe-statement.org).
